# Supplementary material for: Identification of new bisabosqual-type meroterpenoids reveals non-enzymatic conversion of bisabosquals into seco-bisabosquals
Source: Royal Society of Chemistry journal article supplement (doi:10.1039/d3ob01110k), 2023-01-01
Supplement: d3ob01110k1.pdf [file d3ob01110k1.pdf]

## Electronic Supplementary Information

### Identification of new bisabosqual-type meroterpenoids reveals non-enzymatic conversion of bisabosquals to *seco*-bisabosquals

Meng-Xi Tong,<sup>a</sup> Yong-Xia Duan,<sup>a</sup> Ying-Dong Zhang,<sup>a</sup> Wan-Yi Ye,<sup>a</sup> Sheng-Ying Qin,<sup>b</sup> Xing-Zhong Liu,<sup>c</sup> Guo-Dong Chen,<sup>a</sup> Jian-Ming Lv,<sup>\*a</sup> Dan Hu<sup>\*a,d</sup> and Hao Gao<sup>a</sup>

<sup>a</sup> Institute of Traditional Chinese Medicine & Natural Products, College of Pharmacy / Guangdong Province Key Laboratory of Pharmacodynamic Constituents of TCM and New Drugs Research / International Cooperative Laboratory of Traditional Chinese Medicine Modernization and Innovative Drug Development of Ministry of Education (MOE) of China, Jinan University, Guangzhou 510632, China. E-mail: thudan@jnu.edu.cn; ljm21@jnu.edu.cn

<sup>b</sup> Clinical Experimental Center, First Affiliated Hospital of Jinan University, Guangzhou 510630, China

<sup>c</sup> State Key Laboratory of Mycology, Institute of Microbiology, Chinese Academy of Sciences, Beijing 100101, China

<sup>d</sup> Shenzhen Institute of Synthetic Biology, Shenzhen Institute of Advanced Technology, Chinese Academy of Sciences, Shenzhen 518055, China

## Table of Contents

|                                                                                                                            |    |
|----------------------------------------------------------------------------------------------------------------------------|----|
| Supplementary Tables .....                                                                                                 | 1  |
| Table S1 NMR data of 1 ( <sup>1</sup> H for 600 MHz and <sup>13</sup> C for 150 MHz in CDCl <sub>3</sub> ).....            | 1  |
| Table S2 NMR data of 2 ( <sup>1</sup> H for 400 MHz and <sup>13</sup> C for 100 MHz in CDCl <sub>3</sub> ).....            | 2  |
| Table S3 NMR data of 3 ( <sup>1</sup> H for 600 MHz and <sup>13</sup> C for 150 MHz in CDCl <sub>3</sub> ).....            | 3  |
| Table S4 NMR data of 4 ( <sup>1</sup> H for 600 MHz and <sup>13</sup> C for 150 MHz in CDCl <sub>3</sub> ).....            | 4  |
| Table S5 NMR data of 5 ( <sup>1</sup> H for 600 MHz and <sup>13</sup> C for 150 MHz in CDCl <sub>3</sub> ).....            | 5  |
| Table S6 NMR data of 6 ( <sup>1</sup> H for 400 MHz and <sup>13</sup> C for 100 MHz in DMSO- <i>d</i> <sub>6</sub> ) ..... | 6  |
| Table S7 NMR data of 7 ( <sup>1</sup> H for 400 MHz and <sup>13</sup> C for 100 MHz in DMSO- <i>d</i> <sub>6</sub> ) ..... | 7  |
| Table S8 Comparison of experimental and calculated <sup>13</sup> C NMR data of 6.....                                      | 8  |
| Table S9 NMR data of 8 ( <sup>1</sup> H for 400 MHz and <sup>13</sup> C for 100 MHz in CDCl <sub>3</sub> ).....            | 9  |
| Table S10 Primers used in the study .....                                                                                  | 10 |
| Table S11 Plasmids used in the study .....                                                                                 | 11 |
| Supplementary Figures .....                                                                                                | 12 |
| Fig. S1 Structures of known bisabosqual-type meroterpenoids .....                                                          | 12 |
| Fig. S2 Comparison of ECD spectra of 1-5 with those of stachybisbins A and B .....                                         | 13 |
| Fig. S3 HPLC analysis of the <i>S. bisbyi</i> PYH05-7 extract treated with methanol or acetonitrile .....                  | 14 |
| Fig. S4 Most stable conformers of (1' <i>R</i> *,2' <i>R</i> *,3' <i>R</i> *,6' <i>R</i> *,7' <i>S</i> *)-6a.....          | 15 |
| Fig. S5 Most stable conformers of (1' <i>R</i> *,2' <i>R</i> *,3' <i>R</i> *,6' <i>R</i> *,7' <i>R</i> *)-6b .....         | 16 |
| Fig. S6 NMR spectra of 1 .....                                                                                             | 20 |
| Fig. S7 NMR spectra of 2 .....                                                                                             | 23 |
| Fig. S8 NMR spectra of 3 .....                                                                                             | 26 |
| Fig. S9 NMR spectra of 4 .....                                                                                             | 29 |
| Fig. S10 NMR spectra of 5 .....                                                                                            | 32 |
| Fig. S11 NMR spectra of 6 .....                                                                                            | 35 |
| Fig. S12 NMR spectra of 7 .....                                                                                            | 39 |
| Fig. S13 NMR spectra of 8 .....                                                                                            | 42 |
| Supplementary References.....                                                                                              | 43 |

## Supplementary Tables

Table S1 NMR data of **1** ( $^1\text{H}$  for 600 MHz and  $^{13}\text{C}$  for 150 MHz in  $\text{CDCl}_3$ )

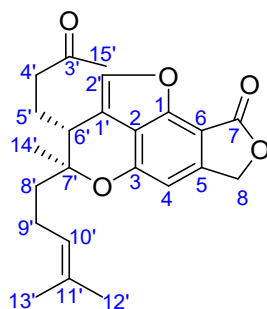

| No. | $\delta_{\text{C}}$ , type | $\delta_{\text{H}}$ (J in Hz) <sup>a</sup>               | $^1\text{H}$ - $^1\text{H}$ COSY         | HMBC                                         | ROESY                                |
|-----|----------------------------|----------------------------------------------------------|------------------------------------------|----------------------------------------------|--------------------------------------|
| 1   | 148.9, C                   |                                                          |                                          |                                              |                                      |
| 2   | 117.8, C                   |                                                          |                                          |                                              |                                      |
| 3   | 155.7, C                   |                                                          |                                          |                                              |                                      |
| 4   | 101.2, CH                  | 6.63, br s                                               | 8                                        | 2, 3, 5, 6, 8                                | 8                                    |
| 5   | 149.0, C                   |                                                          |                                          |                                              |                                      |
| 6   | 103.9, C                   |                                                          |                                          |                                              |                                      |
| 7   | 168.3, C                   |                                                          |                                          |                                              |                                      |
| 8   | 70.3, CH <sub>2</sub>      | 5.35, br s                                               | 4                                        | 4, 5, 6, 7                                   | 4                                    |
| 1'  | 116.0, C                   |                                                          |                                          |                                              |                                      |
| 2'  | 139.2, CH                  | 7.44, br s                                               | 6'                                       | 1, 1', 2, 6'                                 | 4'a, 4'b                             |
| 3'  | 207.7, C                   |                                                          |                                          |                                              |                                      |
| 4'  | 41.0, CH <sub>2</sub>      | a: 2.59, ddd (18.0, 8.4, 5.4)<br>b: 2.44, dt (18.0, 7.8) | 4'b, 5'a, 5'b<br>4'a, 5'a, 5'b           | 3', 5', 6'<br>3', 5', 6'                     | 2'<br>2', 6'                         |
| 5'  | 23.3, CH <sub>2</sub>      | a: 2.19<br>b: 1.54                                       | 4'a, 4'b, 5'b, 6'<br>4'a, 4'b, 5'a, 6'   | 1', 3', 4', 6', 7'<br>1', 3', 4', 6', 7'     | 14'                                  |
| 6'  | 39.4, CH                   | 3.03, br dd (11.4, 3.6)                                  | 2', 5'a, 5'b                             | 1', 2, 2', 4', 5', 7', 8', 14'               | 4'b, 8'a, 9'a, 9'b, 14' <sup>b</sup> |
| 7'  | 86.4, C                    |                                                          |                                          |                                              |                                      |
| 8'  | 38.6, CH <sub>2</sub>      | a: 1.67, ddd (14.4, 11.4, 4.8)<br>b: 1.54                | 8'b, 9'a, 9'b<br>8'a, 9'a, 9'b           | 6', 7', 9', 10', 14'<br>6', 7', 9', 10', 14' | 6'                                   |
| 9'  | 22.2, CH <sub>2</sub>      | a: 2.10<br>b: 2.03                                       | 8'a, 8'b, 9'b, 10'<br>8'a, 8'b, 9'a, 10' | 7', 8', 10', 11'<br>7', 8', 10', 11'         | 6', 13'<br>6', 13'                   |
| 10' | 123.2, CH                  | 4.94, br t (7.2)                                         | 9'a, 9'b, 12', 13'                       | 8', 9', 12', 13'                             | 12'                                  |
| 11' | 132.3, C                   |                                                          |                                          |                                              |                                      |
| 12' | 25.6, CH <sub>3</sub>      | 1.60, br s                                               | 10'                                      | 10', 11', 13'                                | 10'                                  |
| 13' | 17.5, CH <sub>3</sub>      | 1.50, br s                                               | 10'                                      | 10', 11', 12'                                | 9'a, 9'b                             |
| 14' | 21.8, CH <sub>3</sub>      | 1.49, s                                                  |                                          | 6', 7', 8'                                   | 5'a, 6' <sup>b</sup>                 |
| 15' | 30.2, CH <sub>3</sub>      | 2.15, s                                                  |                                          | 3', 4'                                       |                                      |

<sup>a</sup> The indiscernible signals from overlap or the complex multiplicity are reported without designating multiplicity.

<sup>b</sup> The NOE correlation was observed through the 1D-selective NOE experiment.

**Table S2 NMR data of 2 (<sup>1</sup>H for 400 MHz and <sup>13</sup>C for 100 MHz in CDCl<sub>3</sub>)**

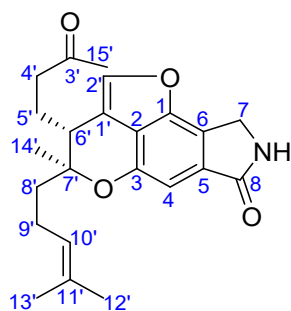

| No. | $\delta_C$ , type     | $\delta_H$ (J in Hz) <sup>a</sup>                        | <sup>1</sup> H- <sup>1</sup> H COSY    | HMBC                 | ROESY        |
|-----|-----------------------|----------------------------------------------------------|----------------------------------------|----------------------|--------------|
| 1   | 147.7, C              |                                                          |                                        |                      |              |
| 2   | 120.4, C              |                                                          |                                        |                      |              |
| 3   | 149.7, C              |                                                          |                                        |                      |              |
| 4   | 102.8, CH             | 7.12, s                                                  |                                        | 2, 3, 6, 8           |              |
| 5   | 131.7, C              |                                                          |                                        |                      |              |
| 6   | 119.8, C              |                                                          |                                        |                      |              |
| 7   | 42.8, CH <sub>2</sub> | 4.59, br s                                               | NH                                     | 1, 5, 6, 8           |              |
| 8   | 172.2, C              |                                                          |                                        |                      |              |
| 1'  | 117.0, C              |                                                          |                                        |                      |              |
| 2'  | 139.7, CH             | 7.42, s                                                  |                                        | 1, 1', 2             | 4'a, 4'b, 6' |
| 3'  | 208.0, C              |                                                          |                                        |                      |              |
| 4'  | 41.0, CH <sub>2</sub> | a: 2.58, ddd (17.2, 8.4, 5.2)<br>b: 2.40, dt (17.6, 7.6) | 4'b, 5'a, 5'b<br>4'a, 5'a, 5'b         | 3', 5'<br>3', 5', 6' | 2'<br>2'     |
| 5'  | 23.6, CH <sub>2</sub> | a: 2.19<br>b: 1.62                                       | 4'a, 4'b, 5'b, 6'<br>4'a, 4'b, 5'a, 6' | 1', 4'               |              |
| 6'  | 39.6, CH              | 2.97, dd (10.4, 3.6)                                     | 5'a, 5'b                               | 1', 2, 2', 4', 5'    | 2', 9'       |
| 7'  | 84.2, C               |                                                          |                                        |                      |              |
| 8'  | 38.4, CH <sub>2</sub> | a: 1.62<br>b: 1.46                                       | 8'b, 9'<br>8'a, 9'                     |                      |              |
| 9'  | 22.2, CH <sub>2</sub> | 2.05                                                     | 8'a, 8'b, 10'                          | 8', 10', 11'         | 6'           |
| 10' | 123.5, CH             | 4.90, br t (7.2)                                         | 9', 12', 13'                           | 9', 12', 13'         | 12'          |
| 11' | 132.0, C              |                                                          |                                        |                      |              |
| 12' | 25.5, CH <sub>3</sub> | 1.58, br s                                               | 10'                                    | 10', 11', 13'        | 10'          |
| 13' | 17.5, CH <sub>3</sub> | 1.48, br s                                               | 10'                                    | 10', 11', 12'        |              |
| 14' | 21.9, CH <sub>3</sub> | 1.48, s                                                  |                                        | 6', 7', 8'           |              |
| 15' | 30.1, CH <sub>3</sub> | 2.12, s                                                  |                                        | 3', 4'               |              |
| NH  |                       | 7.41, br s                                               | 7                                      | 5, 6, 7, 8           |              |

<sup>a</sup> The indiscernible signals from overlap or the complex multiplicity are reported without designating multiplicity.

**Table S3 NMR data of 3 (<sup>1</sup>H for 600 MHz and <sup>13</sup>C for 150 MHz in CDCl<sub>3</sub>)**

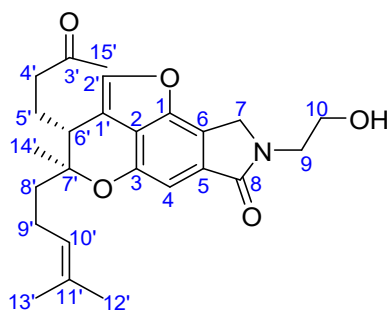

| No. | $\delta_C$ , type     | $\delta_H$ (J in Hz) <sup>a</sup>                        | <sup>1</sup> H- <sup>1</sup> H COSY      | HMBC                                     | ROESY    |
|-----|-----------------------|----------------------------------------------------------|------------------------------------------|------------------------------------------|----------|
| 1   | 147.4, C              |                                                          |                                          |                                          |          |
| 2   | 120.2, C              |                                                          |                                          |                                          |          |
| 3   | 149.7, C              |                                                          |                                          |                                          |          |
| 4   | 102.9, CH             | 7.10, s                                                  |                                          | 2, 3, 6, 8                               |          |
| 5   | 132.1, C              |                                                          |                                          |                                          |          |
| 6   | 117.6, C              |                                                          |                                          |                                          |          |
| 7   | 48.8, CH <sub>2</sub> | 4.64, s                                                  |                                          | 1, 5, 6, 8, 9                            |          |
| 8   | 170.2, C              |                                                          |                                          |                                          |          |
| 9   | 46.6, CH <sub>2</sub> | 3.79, t (4.8)                                            | 10                                       | 7, 8                                     |          |
| 10  | 62.0, CH <sub>2</sub> | 3.92, t (4.8)                                            | 9                                        |                                          |          |
| 1'  | 116.9, C              |                                                          |                                          |                                          |          |
| 2'  | 139.7, CH             | 7.41, d (0.6)                                            | 6'                                       | 1, 1', 2                                 | 4'a, 4'b |
| 3'  | 208.0, C              |                                                          |                                          |                                          |          |
| 4'  | 41.0, CH <sub>2</sub> | a: 2.57, ddd (18.0, 7.8, 4.8)<br>b: 2.39, dt (18.0, 7.8) | 4'b, 5'a, 5'b<br>4'a, 5'a, 5'b           | 3', 5', 6'<br>3', 5', 6'                 | 2'<br>2' |
| 5'  | 23.6, CH <sub>2</sub> | a: 2.18<br>b: 1.61                                       | 4'a, 4'b, 5'b, 6'<br>4'a, 4'b, 5'a, 6'   | 1', 3', 4', 6', 7'<br>1', 3', 4', 6', 7' |          |
| 6'  | 39.6, CH              | 2.97, br dd (10.8, 4.2)                                  | 2', 5'a, 5'b                             | 1', 2, 2', 4', 5', 7'                    |          |
| 7'  | 84.2, C               |                                                          |                                          |                                          |          |
| 8'  | 38.4, CH <sub>2</sub> | a: 1.61<br>b: 1.46                                       | 8'b, 9'a, 9'b<br>8'a, 9'a, 9'b           | 6', 7', 9'<br>9'                         |          |
| 9'  | 22.2, CH <sub>2</sub> | a: 2.08<br>b: 2.01                                       | 8'a, 8'b, 9'b, 10'<br>8'a, 8'b, 9'a, 10' | 10', 11'<br>10', 11'                     |          |
| 10' | 123.5, CH             | 4.90, br t (6.6)                                         | 9'a, 9'b, 12', 13'                       | 12', 13'                                 | 12'      |
| 11' | 132.1, C              |                                                          |                                          |                                          |          |
| 12' | 25.6, CH <sub>3</sub> | 1.58, br s                                               | 10'                                      | 10', 11', 13'                            | 10'      |
| 13' | 17.5, CH <sub>3</sub> | 1.49, br s                                               | 10'                                      | 10', 11', 12'                            |          |
| 14' | 21.8, CH <sub>3</sub> | 1.47, s                                                  |                                          | 6', 7', 8'                               |          |
| 15' | 30.1, CH <sub>3</sub> | 2.12, s                                                  |                                          | 3', 4', 5'                               |          |

<sup>a</sup> The indiscernible signals from overlap or the complex multiplicity are reported without designating multiplicity.

**Table S4 NMR data of 4 (<sup>1</sup>H for 600 MHz and <sup>13</sup>C for 150 MHz in CDCl<sub>3</sub>)**

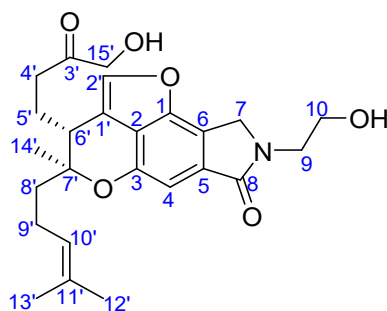

| No. | $\delta_C$ , type     | $\delta_H$ (J in Hz) <sup>a</sup>                        | <sup>1</sup> H- <sup>1</sup> H COSY      | HMBC                               | ROESY                            |
|-----|-----------------------|----------------------------------------------------------|------------------------------------------|------------------------------------|----------------------------------|
| 1   | 147.5, C              |                                                          |                                          |                                    |                                  |
| 2   | 120.1, C              |                                                          |                                          |                                    |                                  |
| 3   | 149.6, C              |                                                          |                                          |                                    |                                  |
| 4   | 103.1 CH              | 7.12, s                                                  |                                          | 2, 3, 6, 8                         |                                  |
| 5   | 132.3, C              |                                                          |                                          |                                    |                                  |
| 6   | 117.7, C              |                                                          |                                          |                                    |                                  |
| 7   | 48.9, CH <sub>2</sub> | 4.64, s                                                  |                                          | 1, 5, 6, 8, 9                      | 9, 10                            |
| 8   | 170.2, C              |                                                          |                                          |                                    |                                  |
| 9   | 46.6, CH <sub>2</sub> | 3.80, t (4.8)                                            | 10                                       | 7, 8, 10                           | 7                                |
| 10  | 62.0, CH <sub>2</sub> | 3.93, t (4.8)                                            | 9                                        |                                    | 7                                |
| 1'  | 116.6, C              |                                                          |                                          |                                    |                                  |
| 2'  | 139.8, CH             | 7.42, s                                                  |                                          | 1, 1', 2, 6'                       | 4'a, 4'b                         |
| 3'  | 208.9, C              |                                                          |                                          |                                    |                                  |
| 4'  | 35.7, CH <sub>2</sub> | a: 2.54, ddd (18.0, 9.0, 4.8)<br>b: 2.36, dt (17.4, 8.4) | 4'b, 5'a, 5'b<br>4'a, 5'a, 5'b           | 3', 5', 6'<br>3', 5', 6'           | 2', 15'a, 15'b<br>2', 15'a, 15'b |
| 5'  | 23.6, CH <sub>2</sub> | a: 2.24<br>b: 1.71                                       | 4'a, 4'b, 5'b, 6'<br>4'a, 4'b, 5'a, 6'   | 1', 6', 7'<br>1', 3', 4', 6', 7'   | 14'                              |
| 6'  | 39.6, CH              | 2.99, dd (10.2, 3.6)                                     | 5'a, 5'b                                 | 1', 2, 2', 4', 5', 7', 8'          | 8'a, 8'b, 9'a, 9'b, 14'          |
| 7'  | 84.0, C               |                                                          |                                          |                                    |                                  |
| 8'  | 38.4, CH <sub>2</sub> | a: 1.61<br>b: 1.44                                       | 8'b, 9'a, 9'b<br>8'a, 9'a, 9'b           | 6', 7', 9', 14'<br>6', 7', 9', 14' | 6'<br>6'                         |
| 9'  | 22.2, CH <sub>2</sub> | a: 2.07<br>b: 2.00                                       | 8'a, 8'b, 9'b, 10'<br>8'a, 8'b, 9'a, 10' | 8', 10', 11'<br>8', 10', 11'       | 6', 14'<br>6', 14'               |
| 10' | 123.4, CH             | 4.89, br t (7.2)                                         | 9'a, 9'b, 12', 13'                       | 9', 12', 13'                       | 12'                              |
| 11' | 132.2, C              |                                                          |                                          |                                    |                                  |
| 12' | 25.6, CH <sub>3</sub> | 1.58, br s                                               | 10'                                      | 10', 11', 13'                      | 10'                              |
| 13' | 17.6, CH <sub>3</sub> | 1.48, br s                                               | 10'                                      | 10', 11', 12'                      |                                  |
| 14' | 22.0, CH <sub>3</sub> | 1.50, s                                                  |                                          | 6', 7', 8'                         | 5'a, 6', 9'a, 9'b                |
| 15' | 68.2, CH <sub>2</sub> | a: 4.23, d (18.6)<br>b: 4.16, d (18.6)                   | 15'b<br>15'a                             | 3'<br>3'                           | 4'a, 4'b<br>4'a, 4'b             |

<sup>a</sup> The indiscernible signals due to overlap or the complex multiplicity are reported without designating multiplicity.

**Table S5 NMR data of 5 (<sup>1</sup>H for 600 MHz and <sup>13</sup>C for 150 MHz in CDCl<sub>3</sub>)**

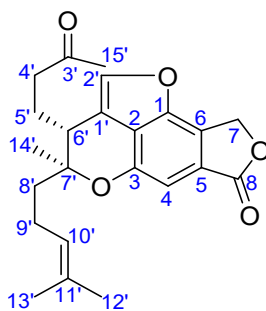

| No. | $\delta_C$ , type     | $\delta_H$ (J in Hz) <sup>a</sup>                        | <sup>1</sup> H- <sup>1</sup> H COSY      | HMBC                             | ROESY              |
|-----|-----------------------|----------------------------------------------------------|------------------------------------------|----------------------------------|--------------------|
| 1   | 146.4, C              |                                                          |                                          |                                  |                    |
| 2   | 122.3, C              |                                                          |                                          |                                  |                    |
| 3   | 150.4, C              |                                                          |                                          |                                  |                    |
| 4   | 104.1, CH             | 7.13, s                                                  |                                          | 2, 3, 6, 8                       |                    |
| 5   | 125.0, C              |                                                          |                                          |                                  |                    |
| 6   | 123.1, C              |                                                          |                                          |                                  |                    |
| 7   | 66.9, CH <sub>2</sub> | 5.44, s                                                  |                                          | 1, 5, 6, 8                       |                    |
| 8   | 171.3, C              |                                                          |                                          |                                  |                    |
| 1'  | 117.2, C              |                                                          |                                          |                                  |                    |
| 2'  | 141.0, CH             | 7.50, d (0.6)                                            | 6'                                       | 1, 1', 2                         | 4'a, 4'b           |
| 3'  | 207.8, C              |                                                          |                                          |                                  |                    |
| 4'  | 40.9, CH <sub>2</sub> | a: 2.58, ddd (18.0, 7.8, 5.4)<br>b: 2.40, dt (18.0, 7.8) | 4'b, 5'a, 5'b<br>4'a, 5'a, 5'b           | 3', 5', 6'<br>3', 5', 6'         | 2', 6'<br>2', 6'   |
| 5'  | 23.5, CH <sub>2</sub> | a: 2.18<br>b: 1.57                                       | 4'a, 4'b, 5'b, 6'<br>4'a, 4'b, 5'a, 6'   | 1', 6', 7'<br>1', 3', 4', 6', 7' |                    |
| 6'  | 39.5, CH              | 3.00, br dd (10.8, 3.6)                                  | 2', 5'a, 5'b                             | 1', 2, 2', 4', 5'                | 4'a, 4'b, 9'a, 9'b |
| 7'  | 84.7, C               |                                                          |                                          |                                  |                    |
| 8'  | 38.4, CH <sub>2</sub> | a: 1.61<br>b: 1.48                                       | 8'b, 9'a, 9'b<br>8'a, 9'a, 9'b           | 6', 7', 14'<br>9', 14'           |                    |
| 9'  | 22.2, CH <sub>2</sub> | a: 2.08<br>b: 2.02                                       | 8'a, 8'b, 9'b, 10'<br>8'a, 8'b, 9'a, 10' | 8', 10', 11'<br>8', 10', 11'     | 6'<br>6'           |
| 10' | 123.3, CH             | 4.91, br t (7.2)                                         | 9'a, 9'b, 12', 13'                       | 9', 12', 13'                     | 12'                |
| 11' | 132.2, C              |                                                          |                                          |                                  |                    |
| 12' | 25.6, CH <sub>3</sub> | 1.59, br s                                               | 10'                                      | 10', 11', 13'                    | 10'                |
| 13' | 17.5, CH <sub>3</sub> | 1.48, br s                                               | 10'                                      | 10', 11', 12'                    |                    |
| 14' | 21.8, CH <sub>3</sub> | 1.48, s                                                  |                                          | 6', 7', 8'                       |                    |
| 15' | 30.1, CH <sub>3</sub> | 2.14, s                                                  |                                          | 3', 4'                           |                    |

<sup>a</sup> The indiscernible signals from overlap or the complex multiplicity are reported without designating multiplicity.

**Table S6 NMR data of 6 (<sup>1</sup>H for 400 MHz and <sup>13</sup>C for 100 MHz in DMSO-*d*<sub>6</sub>)**

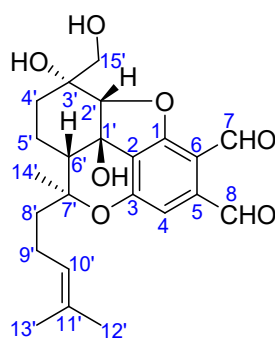

| No.   | $\delta_C$ , type     | $\delta_H$ (J in Hz) <sup>a</sup>      | <sup>1</sup> H- <sup>1</sup> H COSY      | HMBC                     | ROESY                 |
|-------|-----------------------|----------------------------------------|------------------------------------------|--------------------------|-----------------------|
| 1     | 167.7, C              |                                        |                                          |                          |                       |
| 2     | 118.9, C              |                                        |                                          |                          |                       |
| 3     | 155.6, C              |                                        |                                          |                          |                       |
| 4     | 108.8, CH             | 6.67, s                                |                                          | 2, 3, 6, 8               | 8                     |
| 5     | 140.4, C              |                                        |                                          |                          |                       |
| 6     | 112.1, C              |                                        |                                          |                          |                       |
| 7     | 187.2, CH             | 10.16, s                               |                                          | 1, 5, 6                  |                       |
| 8     | 192.8, CH             | 10.40, s                               |                                          | 4, 5                     | 4                     |
| 1'    | 71.8, C               |                                        |                                          |                          |                       |
| 2'    | 96.8, CH              | 4.99, s                                |                                          | 1, 1', 2, 15'            | 6', 15'a, 15'b, 1'-OH |
| 3'    | 71.8, C               |                                        |                                          |                          |                       |
| 4'    | 29.9, CH <sub>2</sub> | a: 1.48<br>b: 1.35                     | 4'b, 5'a, 5'b<br>4'a, 5'a, 5'b           | 5', 6'<br>2', 3', 5', 6' |                       |
| 5'    | 17.1, CH <sub>2</sub> | a: 1.50<br>b: 1.04                     | 4'a, 4'b, 5'b, 6'<br>4'a, 4'b, 5'a, 6'   | 4'<br>3', 6'             |                       |
| 6'    | 41.7, CH              | 2.22                                   | 5'a, 5'b                                 | 1', 5'                   | 2', 1'-OH             |
| 7'    | 84.9, C               |                                        |                                          |                          |                       |
| 8'    | 39.9, CH <sub>2</sub> | a: 2.17<br>b: 1.77                     | 8'b, 9'a, 9'b<br>8'a, 9'a, 9'b           | 7', 9', 14'<br>6', 7'    |                       |
| 9'    | 23.3, CH <sub>2</sub> | a: 2.19<br>b: 1.89                     | 8'a, 8'b, 9'b, 10'<br>8'a, 8'b, 9'a, 10' | 8', 10'<br>8', 10', 11'  |                       |
| 10'   | 124.3, CH             | 5.03                                   | 9'a, 9'b, 12', 13'                       | 9', 12', 13'             | 12'                   |
| 11'   | 130.7, C              |                                        |                                          |                          |                       |
| 12'   | 25.4, CH <sub>3</sub> | 1.61, br s                             | 10'                                      | 10', 11', 13'            | 10'                   |
| 13'   | 17.5, CH <sub>3</sub> | 1.56, br s                             | 10'                                      | 10', 11', 12'            |                       |
| 14'   | 23.6, CH <sub>3</sub> | 1.41, s                                |                                          | 6', 7', 8'               |                       |
| 15'   | 66.1, CH <sub>2</sub> | a: 3.43, d (10.9)<br>b: 3.04, d (10.9) | 15'b<br>15'a                             | 2', 3', 4'<br>2', 3', 4' | 2'<br>2'              |
| 1'-OH |                       | 5.92, s                                |                                          | 2                        | 2', 6'                |

<sup>a</sup> The indiscernible signals from overlap or the complex multiplicity are reported without designating multiplicity.



**Table S7 NMR data of 7 (<sup>1</sup>H for 400 MHz and <sup>13</sup>C for 100 MHz in DMSO-*d*<sub>6</sub>)**

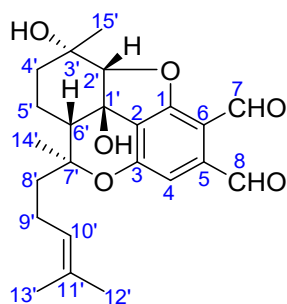

| No.   | $\delta_C^a$ , type   | $\delta_H$ (J in Hz) <sup>a, b</sup> | $\delta_C$ , type     | $\delta_H$ (J in Hz) <sup>b</sup> | <sup>1</sup> H- <sup>1</sup> H COSY      | HMBC                                | ROESY               |
|-------|-----------------------|--------------------------------------|-----------------------|-----------------------------------|------------------------------------------|-------------------------------------|---------------------|
| 1     | 166.3, C              |                                      | 167.7, C              |                                   |                                          |                                     |                     |
| 2     | 118.0, C              |                                      | 118.8, C              |                                   |                                          |                                     |                     |
| 3     | 156.7, C              |                                      | 155.6, C              |                                   |                                          |                                     |                     |
| 4     | 113.2, CH             | 6.90, s                              | 108.7, CH             | 6.66, s                           |                                          | 2, 3, 6, 8                          | 8                   |
| 5     | 141.2, C              |                                      | 140.4, C              |                                   |                                          |                                     |                     |
| 6     | 112.5, C              |                                      | 112.1, C              |                                   |                                          |                                     |                     |
| 7     | 187.7, CH             | 10.38, s                             | 187.2, CH             | 10.18, s                          |                                          | 5, 6                                |                     |
| 8     | 192.3, CH             | 10.37, s                             | 192.8, CH             | 10.41, s                          |                                          | 4, 5                                | 4                   |
| 1'    | 70.9, C               |                                      | 69.3, C               |                                   |                                          |                                     |                     |
| 2'    | 101.6, CH             | 4.76, s                              | 101.8, CH             | 4.66, s                           |                                          | 1, 1', 2, 15'                       | 4'b, 6', 15', 1'-OH |
| 3'    | 70.1, C               |                                      | 68.6, C               |                                   |                                          |                                     |                     |
| 4'    | 34.2, CH <sub>2</sub> | a: 1.75<br>b: 1.35                   | 34.4, CH <sub>2</sub> | a: 1.47<br>b: 1.31                | 4'b, 5'a, 5'b<br>4'a, 5'a, 5'b           | 2', 3', 6'                          | 2', 6'              |
| 5'    | 18.0, CH <sub>2</sub> | a: 1.59<br>b: 1.18                   | 17.6, CH <sub>2</sub> | a: 1.46<br>b: 1.05                | 4'a, 4'b, 5'b, 6'<br>4'a, 4'b, 5'a, 6'   | 3', 6'<br>4', 6', 7'                | 3'-OH               |
| 6'    | 41.2, CH              | 2.29, dd (12.9, 6.0)                 | 41.5, CH              | 2.23, dd (13.2, 5.2)              | 5'a, 5'b                                 | 1', 5', 8'                          | 2', 4'b, 1'-OH      |
| 7'    | 85.3, C               |                                      | 84.9, C               |                                   |                                          |                                     |                     |
| 8'    | 40.5, CH <sub>2</sub> | a: 2.14<br>b: 1.86                   | 39.9, CH <sub>2</sub> | a: 2.15<br>b: 1.78                | 8'b, 9'a, 9'b<br>8'a, 9'a, 9'b           | 7', 9', 10', 14'<br>6', 7', 9', 14' | 1'-OH               |
| 9'    | 23.8, CH <sub>2</sub> | a: 2.22<br>b: 1.97                   | 23.3, CH <sub>2</sub> | a: 2.17<br>b: 1.91                | 8'a, 8'b, 9'b, 10'<br>8'a, 8'b, 9'a, 10' | 7', 10'<br>8'                       |                     |
| 10'   | 123.6, CH             | 5.06, br t (6.0)                     | 124.2, CH             | 5.03, br t (6.4)                  | 9'a, 9'b, 12', 13'                       | 9', 12', 13'                        | 12'                 |
| 11'   | 132.0, C              |                                      | 130.7, C              |                                   |                                          |                                     |                     |
| 12'   | 25.6, CH <sub>3</sub> | 1.64, br s                           | 25.4, CH <sub>3</sub> | 1.61, br s                        | 10'                                      | 10', 11', 13'                       | 10'                 |
| 13'   | 17.7, CH <sub>3</sub> | 1.59, br s                           | 17.5, CH <sub>3</sub> | 1.56, br s                        | 10'                                      | 10', 11', 12'                       |                     |
| 14'   | 23.8, CH <sub>3</sub> | 1.47, s                              | 23.4, CH <sub>3</sub> | 1.40, s                           |                                          | 6', 7', 8'                          |                     |
| 15'   | 29.3, CH <sub>3</sub> | 1.35, s                              | 28.6, CH <sub>3</sub> | 1.22, s                           |                                          | 2', 3', 4'                          | 2'                  |
| 1'-OH |                       |                                      |                       | 5.85, s                           |                                          | 1', 2, 6'                           | 2', 6', 8'a         |
| 3'-OH |                       |                                      |                       | 4.15, s                           |                                          | 2', 3', 4'                          | 5'b                 |

<sup>a</sup> The data were recorded at 400 MHz (<sup>1</sup>H NMR) and 100 MHz (<sup>13</sup>C NMR) in CDCl<sub>3</sub>.

<sup>b</sup> The indiscernible signals from overlap or the complex multiplicity are reported without designating multiplicity.

**Table S8 Comparison of experimental and calculated <sup>13</sup>C NMR data of 6**

| <b>No.</b>     | <b>6</b> | <b>6a</b> | <b>AE</b> | <b>6b</b> | <b>AE</b> |
|----------------|----------|-----------|-----------|-----------|-----------|
| C-1            | 167.7    | 165.8     | 1.9       | 166.8     | 0.9       |
| C-2            | 118.9    | 118.0     | 0.9       | 119.5     | 0.6       |
| C-3            | 155.6    | 154.1     | 1.5       | 154.3     | 1.3       |
| C-4            | 108.8    | 109.3     | 0.5       | 109.1     | 0.3       |
| C-5            | 140.4    | 137.8     | 2.6       | 137.8     | 2.6       |
| C-6            | 112.1    | 110.5     | 1.6       | 110.7     | 1.4       |
| C-7            | 187.2    | 184.8     | 2.4       | 184.8     | 2.4       |
| C-8            | 192.8    | 191.7     | 1.1       | 191.7     | 1.1       |
| C-1'           | 71.8     | 74.2      | 2.4       | 74.1      | 2.3       |
| C-2'           | 96.8     | 100.6     | 3.8       | 102.0     | 5.2       |
| C-3'           | 71.8     | 74.8      | 3.0       | 74.0      | 2.2       |
| C-4'           | 29.9     | 32.6      | 2.7       | 32.6      | 2.7       |
| C-5'           | 17.1     | 23.5      | 6.4       | 23.5      | 6.4       |
| C-6'           | 41.7     | 43.0      | 1.3       | 44.1      | 2.4       |
| C-7'           | 84.9     | 87.2      | 2.3       | 86.9      | 2.0       |
| C-8'           | 39.9     | 42.5      | 2.6       | 41.6      | 1.7       |
| C-9'           | 23.3     | 28.9      | 5.6       | 28.3      | 5.0       |
| C-14'          | 23.6     | 29.1      | 5.5       | 30.7      | 7.1       |
| C-15'          | 66.1     | 71.9      | 5.8       | 73.7      | 7.6       |
| MAE            |          | 2.83      |           | 2.92      |           |
| R <sup>2</sup> |          | 0.9991    |           | 0.9986    |           |
| DP4+           |          | 98.30%    |           | 1.70%     |           |

**Table S9 NMR data of 8 (<sup>1</sup>H for 400 MHz and <sup>13</sup>C for 100 MHz in CDCl<sub>3</sub>)**

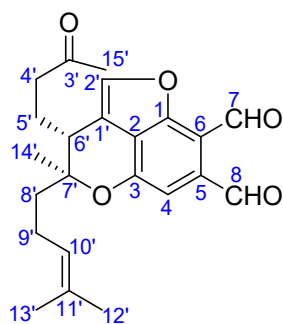

| No. | $\delta_C$ , type      | $\delta_H$ (J in Hz) <sup>a</sup> | <sup>1</sup> H- <sup>1</sup> H COSY    | HMBC                 | ROESY    |
|-----|------------------------|-----------------------------------|----------------------------------------|----------------------|----------|
| 1   | 153.8, C               |                                   |                                        |                      |          |
| 2   | 121.8, C               |                                   |                                        |                      |          |
| 3   | 154.1, C               |                                   |                                        |                      |          |
| 4   | 110.7, CH              | 7.23, s                           |                                        | 2, 3, 6, 8           | 8        |
| 5   | 137.2, C               |                                   |                                        |                      |          |
| 6   | 115.7 <sup>b</sup> , C |                                   |                                        |                      |          |
| 7   | 187.7, CH              | 10.77, s                          |                                        | 1, 5, 6              |          |
| 8   | 192.1, CH              | 10.58, s                          |                                        | 4, 5, 6              | 4        |
| 1'  | 115.8 <sup>b</sup> , C |                                   |                                        |                      |          |
| 2'  | 142.2, CH              | 7.58, br s                        | 6'                                     | 1, 1', 2             | 4'a, 4'b |
| 3'  | 207.5, C               |                                   |                                        |                      |          |
| 4'  | 40.9, CH <sub>2</sub>  | a: 2.56<br>b: 2.43                | 4'b, 5'a, 5'b<br>4'a, 5'a, 5'b         | 3', 5'<br>3', 5', 6' | 2'<br>2' |
| 5'  | 23.4, CH <sub>2</sub>  | a: 2.20<br>b: 1.54                | 4'a, 4'b, 5'b, 6'<br>4'a, 4'b, 5'a, 6' | 4'                   |          |
| 6'  | 39.5, CH               | 3.06, br dd (10.9, 3.4)           | 2', 5'a, 5'b                           | 1', 2, 2', 4', 5'    | 9'       |
| 7'  | 86.7, C                |                                   |                                        |                      |          |
| 8'  | 38.5, CH <sub>2</sub>  | a: 1.65<br>b: 1.55                | 8'b, 9'<br>8'a, 9'                     |                      |          |
| 9'  | 22.2, CH <sub>2</sub>  | 2.06                              | 8'a, 8'b, 10'                          | 8', 10', 11'         | 6'       |
| 10' | 123.0, CH              | 4.92, br t (7.0)                  | 9', 12', 13'                           | 9', 12', 13'         | 12'      |
| 11' | 132.4, C               |                                   |                                        |                      |          |
| 12' | 25.5, CH <sub>3</sub>  | 1.59, br s                        | 10'                                    | 10', 11', 13'        | 10'      |
| 13' | 17.5, CH <sub>3</sub>  | 1.49, br s                        | 10'                                    | 10', 11', 12'        |          |
| 14' | 21.7, CH <sub>3</sub>  | 1.49, s                           |                                        | 6', 7', 8'           |          |
| 15' | 30.1, CH <sub>3</sub>  | 2.14, s                           |                                        | 3', 4'               |          |

<sup>a</sup> The indiscernible signals from overlap or the complex multiplicity are reported without designating multiplicity.

<sup>b</sup> The data are interchangeable.

**Table S10 Primers used in the study**

| Primer           | Sequence (5' to 3')                                                     | Usage                                                                            |
|------------------|-------------------------------------------------------------------------|----------------------------------------------------------------------------------|
| Inf-Bar-F-EcoRV  | CCAAGCATCGAAGATATGAGCCCAGAACGACGCC                                      | Cloning the <i>bar</i> gene from pPTRI                                           |
| Inf-Bar-R-EcoRV  | TCGGCATCTACTGATTCAGATCTCGGTGACGGGCAG                                    |                                                                                  |
| TtrPC-Bar-ANN1-F | TATTCTTTTGATTTAGCAATTAACCCTCACTAAAG                                     | Cloning the <i>bar</i> gene expression cassette from pBSKII-PtrPC-BAR-TtrPC      |
| TtrPC-Bar-ANN1-R | CGGCAAAATCCCTTATATCGATAAGCTTCAGGGCT                                     |                                                                                  |
| gRNA-gstbA-F     | TAATACGACTCACTATAGGAGTCGCAGAACTCGCGGC <del>GT</del> TTTTAGAGCTAGAAATAGC | Cloning gRNA scaffold from pUCm-gRNAscaffold- <i>eGFP</i>                        |
| eGFP-R           | TTACACCTTCCTCTTCTTC                                                     |                                                                                  |
| PtrPC-XbaI-F     | GCTCTAGAGCGCAATTAACCCTCACTAA                                            | Cloning the <i>neo</i> marker gene cassette from pBSKII-PtrPC- <i>neo</i> -TtrPC |
| TtrPC-HindIII-R  | CCCAAGCTTCAGGGCTGGTGACGGAATTTTCATAG                                     |                                                                                  |
| pUCm-F           | TCGCGCGTTTCGGTGATGAC                                                    | Cloning the gRNA cassette from pUCm-gRNA- <i>stbA</i>                            |
| gRNA-R           | AAAAGCACCGACTCGGTGCC                                                    |                                                                                  |

**Table S11 Plasmids used in the study**

| <b>Plasmid</b>                          | <b>Characteristic</b>                                                                                                                       | <b>Source</b>                             |
|-----------------------------------------|---------------------------------------------------------------------------------------------------------------------------------------------|-------------------------------------------|
| pUCm-T                                  | A commercial vector for cloning and <i>in vitro</i> transcription                                                                           | Sangon Biotech Co., Ltd. (China)          |
| pBARI                                   | Plasmid containing <i>bar</i> marker gene cassette (Amp <sup>R</sup> )                                                                      | Matsuda, Y. <i>et al.</i> <sup>[1]</sup>  |
| pBSKII-PtrPC-EcoRV-TtrPC                | Plasmid containing the <i>trpC</i> promoter and terminator (Amp <sup>R</sup> )                                                              | Zheng, Y.-M. <i>et al.</i> <sup>[2]</sup> |
| pBSKII-PtrPC-Flag- <i>toCas9</i> -TtrPC | Plasmid containing <i>Cas9</i> whose expression is regulated by the <i>trpC</i> promoter (Amp <sup>R</sup> )                                | Zheng, Y.-M. <i>et al.</i> <sup>[2]</sup> |
| pUCm-gRNAscaffold- <i>eGFP</i>          | Plasmid containing gRNA scaffold                                                                                                            | Zheng, Y.-M. <i>et al.</i> <sup>[2]</sup> |
| pBSKII-PtrPC- <i>neo</i> -TtrPC         | Plasmid containing <i>neo</i> whose expression is regulated by the <i>trpC</i> promoter (Amp <sup>R</sup> )                                 | Zheng, Y.-M. <i>et al.</i> <sup>[2]</sup> |
| pBSKII-PtrPC-BAR-TtrPC                  | Plasmid containing <i>bar</i> whose expression is regulated by the <i>trpC</i> promoter (Amp <sup>R</sup> )                                 | This work                                 |
| pBSKII- <i>toCas9</i> - <i>bar</i>      | Plasmid containing <i>Cas9</i> and <i>bar</i> whose expressions are independently regulated by the <i>trpC</i> promoter (Amp <sup>R</sup> ) | This work                                 |
| pUCm-gRNA- <i>stbA</i>                  | Recombinant pUCm used for <i>in vitro</i> transcription to generate gRNA targeting <i>stbA</i> (Amp <sup>R</sup> )                          | This work                                 |

## Supplementary Figures

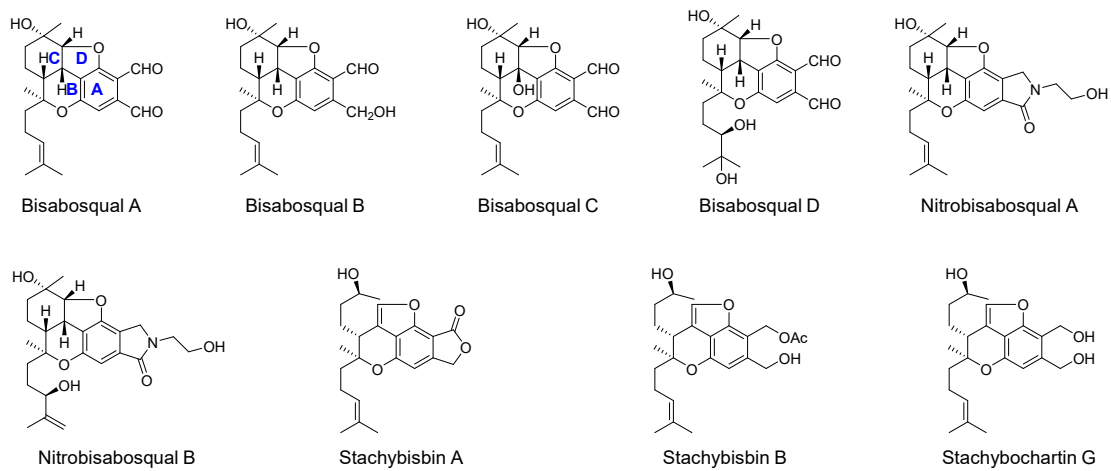

**Fig. S1 Structures of known bisabosqual-type meroterpenoids**

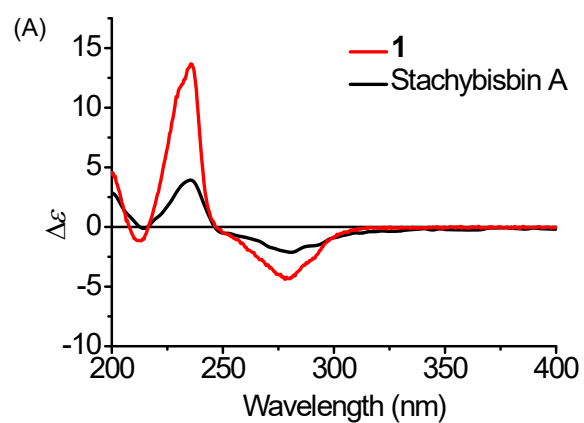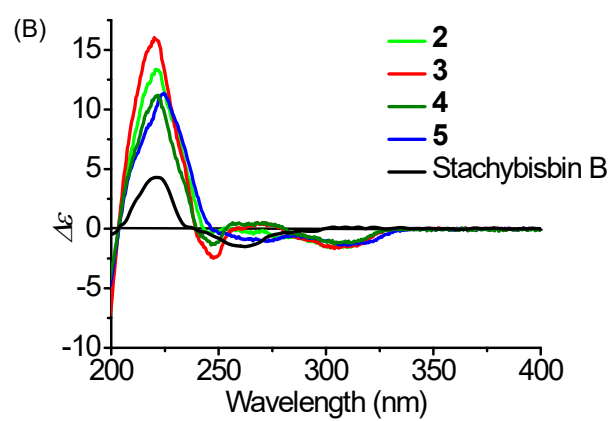

**Fig. S2 Comparison of ECD spectra of 1-5 with those of stachybisbins A and B**

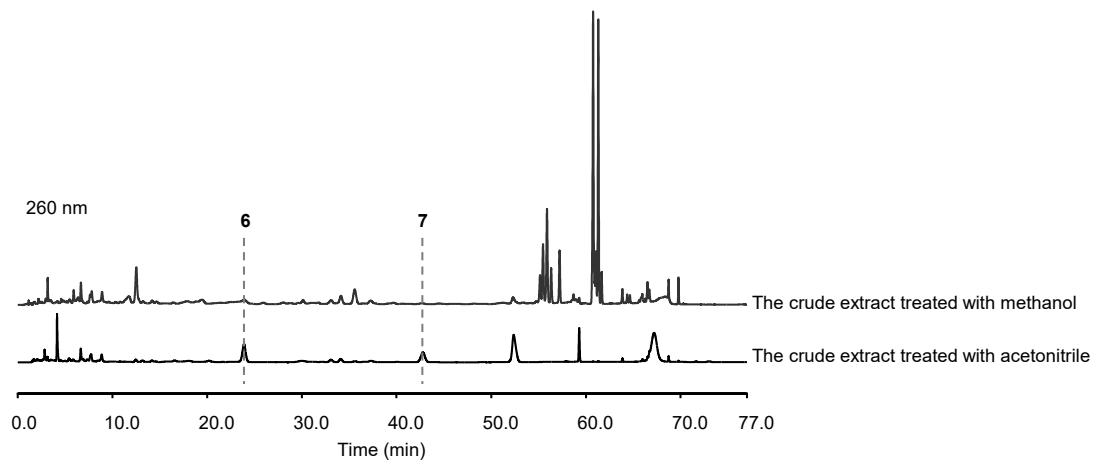

**Fig. S3 HPLC analysis of the *S. bisbyi* PYH05-7 extract treated with methanol or acetonitrile**

The culture broth of *S. bisbyi* PYH05-7 grown in liquid maltose medium was extracted with ethyl acetate. Subsequently, the resulted crude extract was stored in methanol or acetonitrile for one day, and then used for HPLC analysis.



(1'*R*\*,2'*R*\*,3'*R*\*,6'*R*\*,7'*S*')-6a

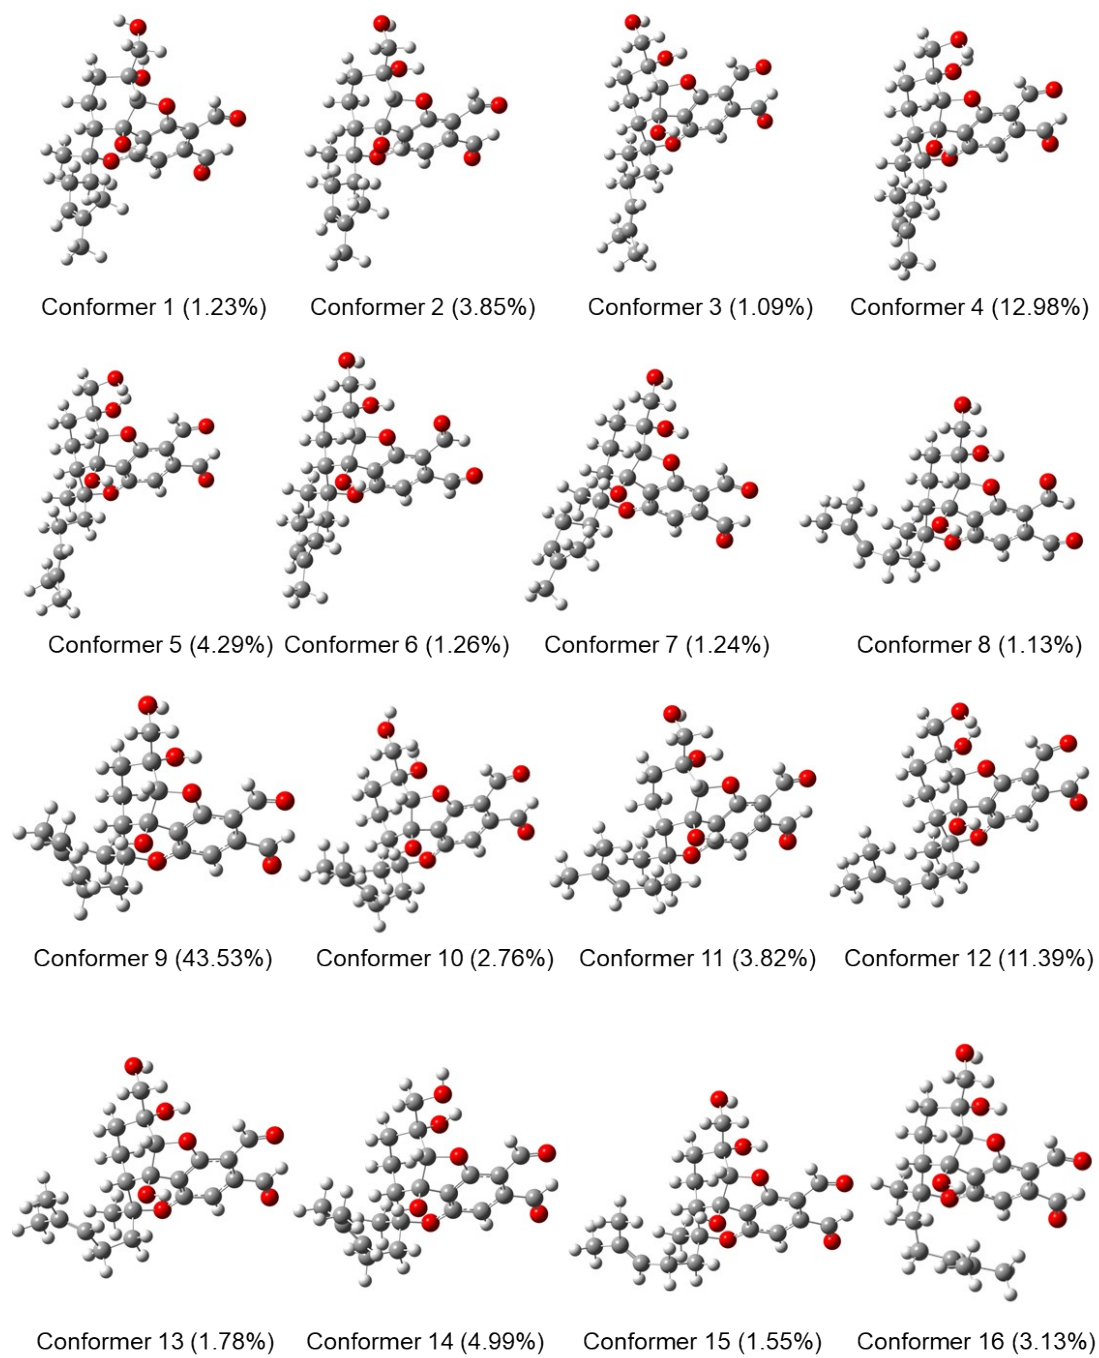

**Fig. S4 Most stable conformers of (1'*R*\*,2'*R*\*,3'*R*\*,6'*R*\*,7'*S*')-6a**

**(1'R\*,2'R\*,3'R\*,6'R\*,7'R\*)-6b**

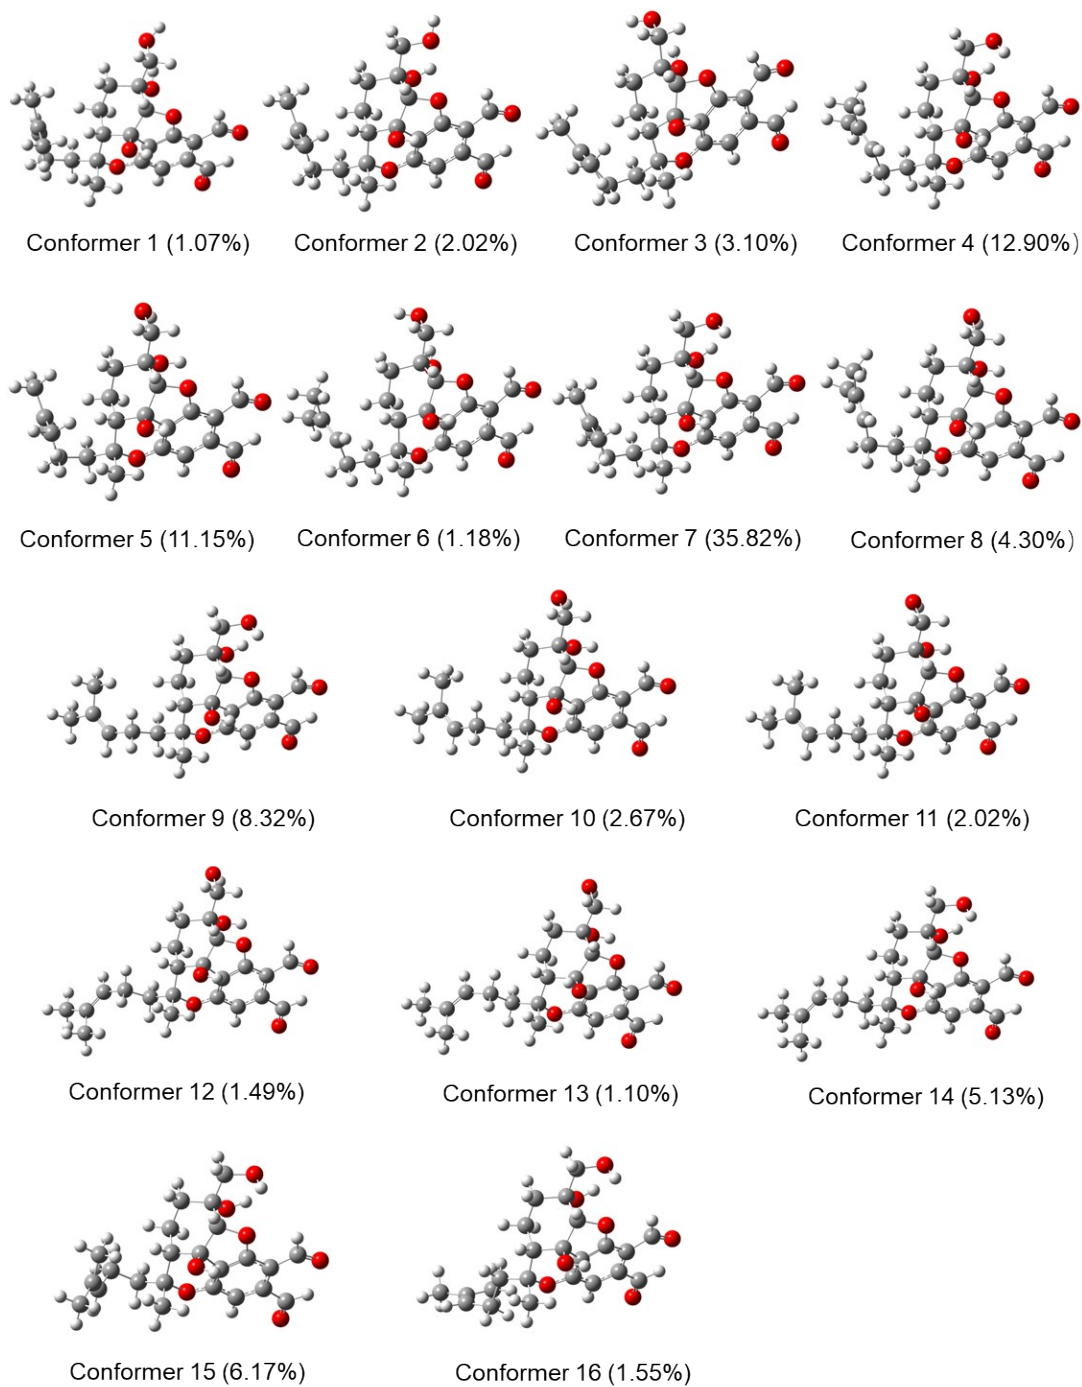

**Fig. S5 Most stable conformers of (1'R\*,2'R\*,3'R\*,6'R\*,7'R\*)-6b**

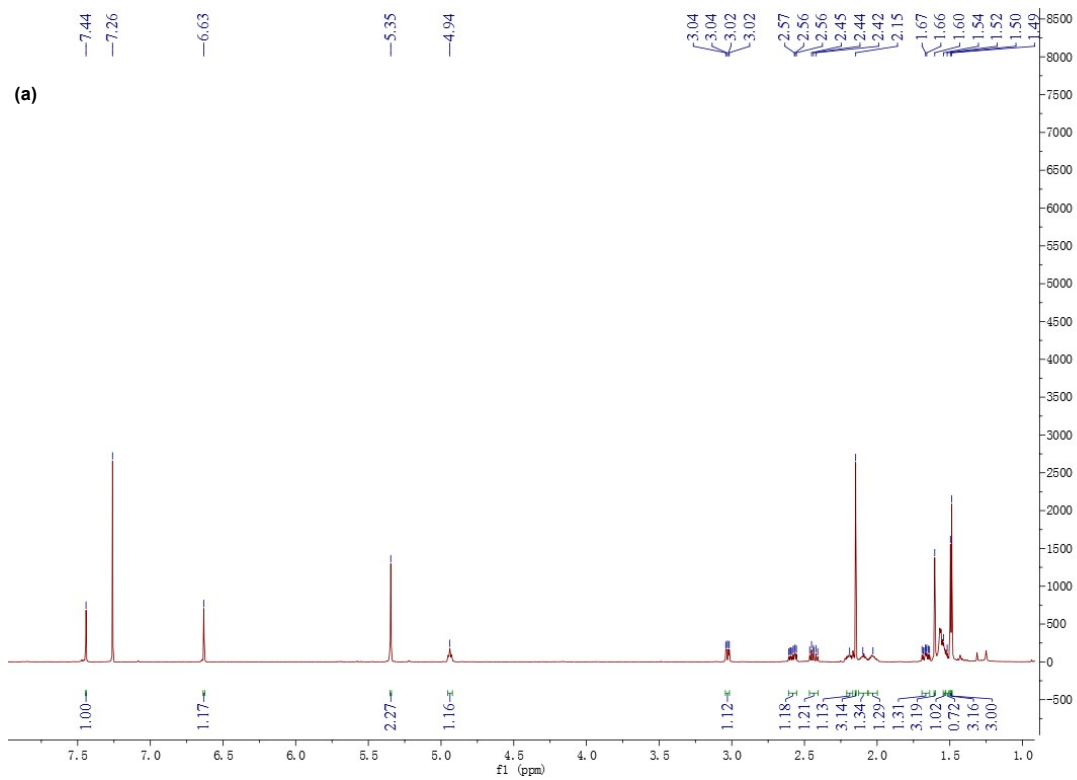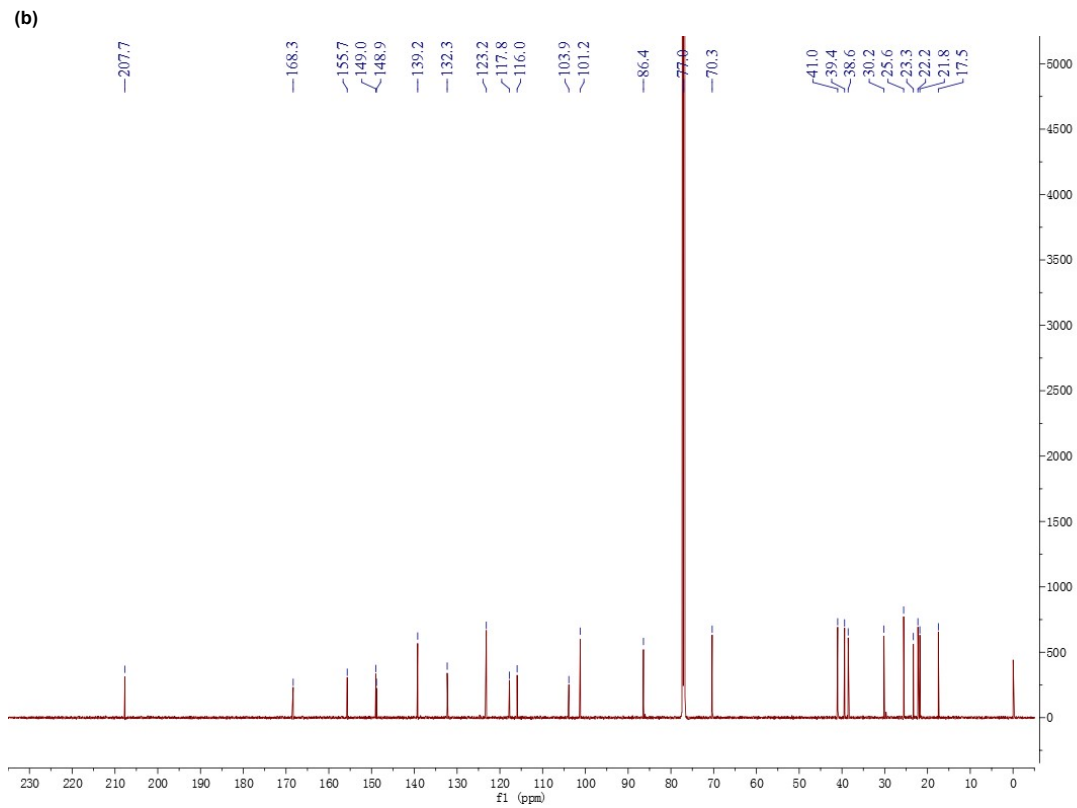

(c)

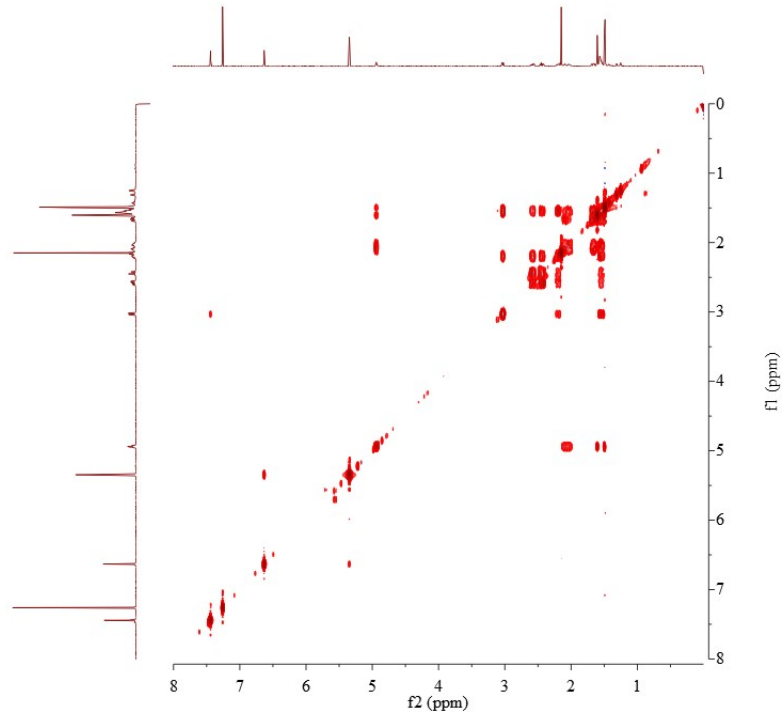

(d)

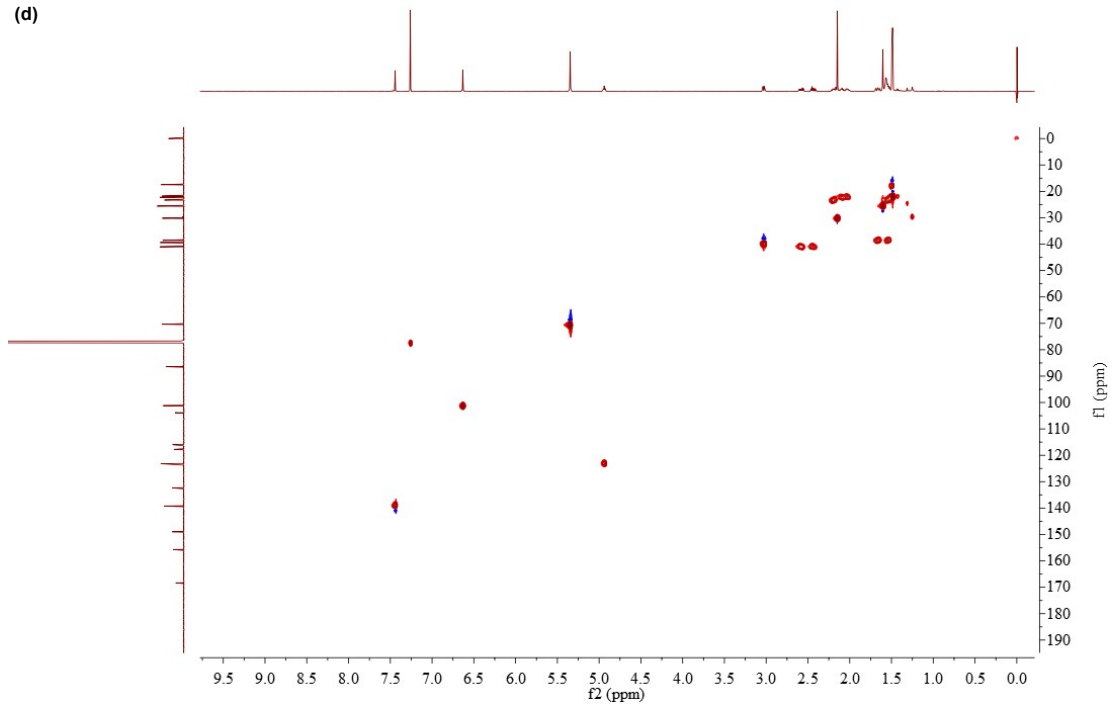

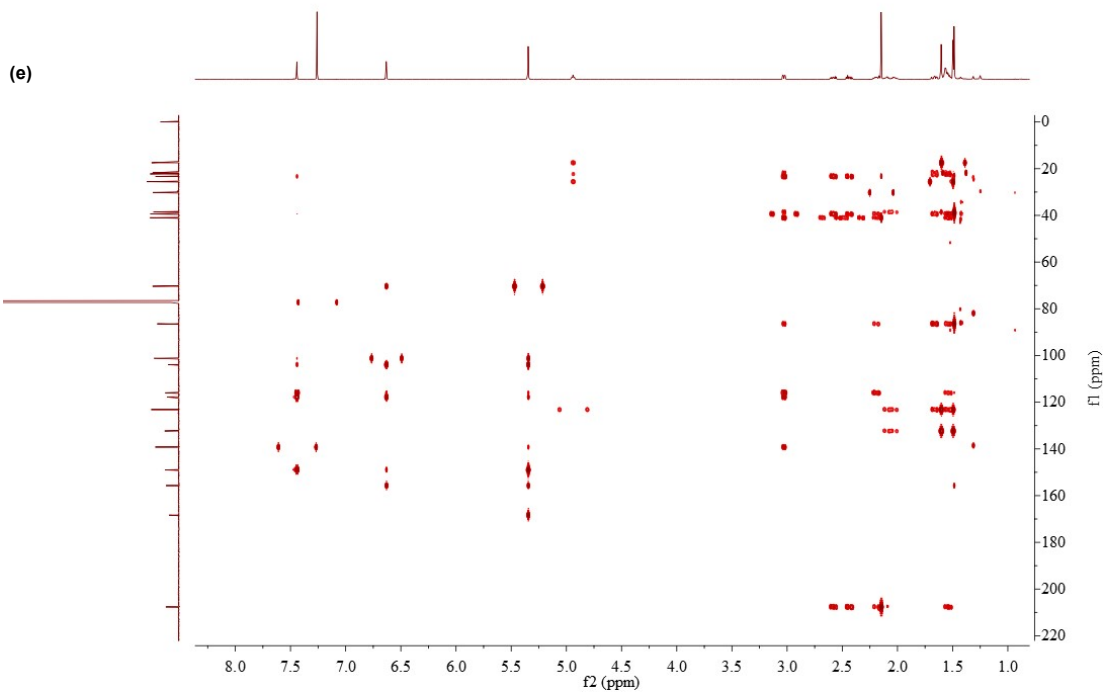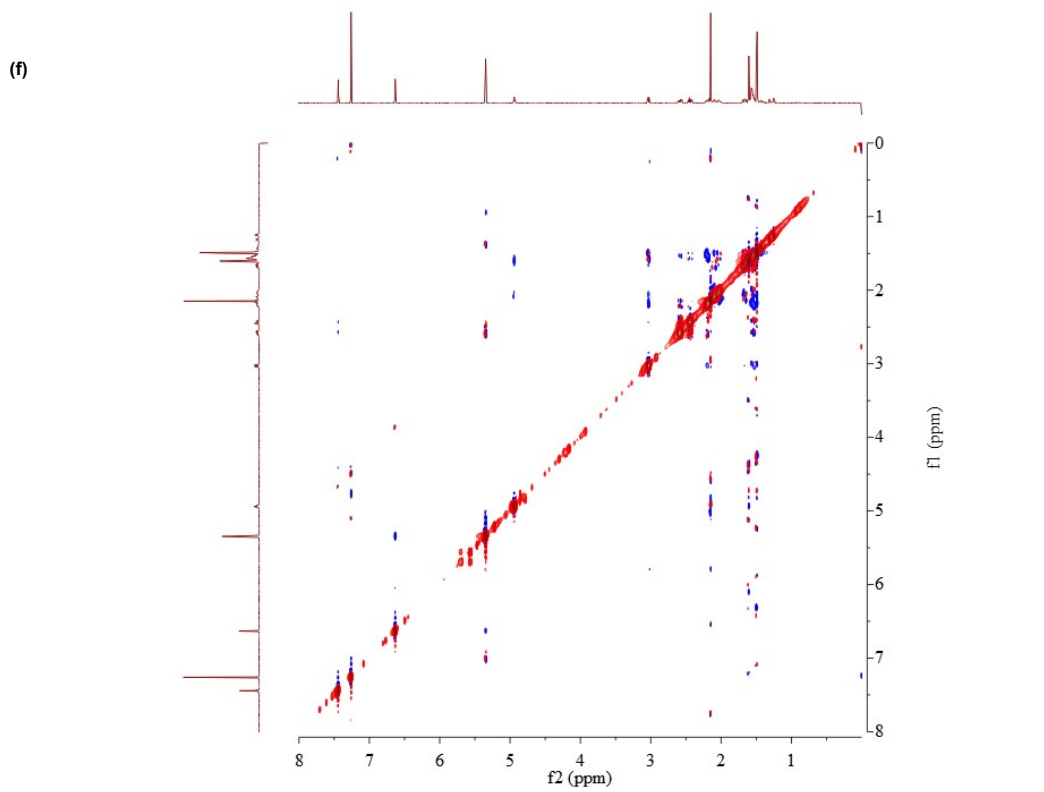

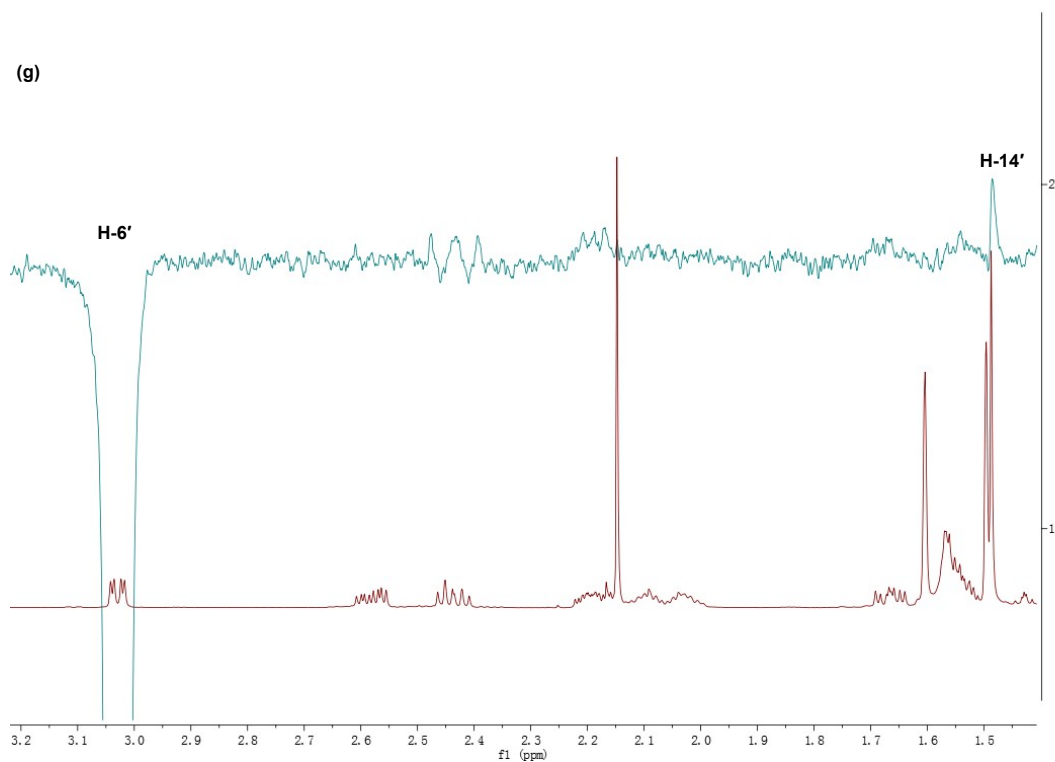

**Fig. S6 NMR spectra of 1**

(a)  $^1\text{H}$  NMR spectrum in  $\text{CDCl}_3$  at 600 MHz; (b)  $^{13}\text{C}$  NMR spectrum in  $\text{CDCl}_3$  at 150 MHz; (c)  $^1\text{H}$ - $^1\text{H}$  COSY spectrum in  $\text{CDCl}_3$  at 600 MHz; (d) HSQC spectrum in  $\text{CDCl}_3$  at 600 MHz; (e) HMBC spectrum in  $\text{CDCl}_3$  at 600 MHz; (f) ROESY spectrum in  $\text{CDCl}_3$  at 600 MHz; (g) 1D-selective NOE experiment in  $\text{CDCl}_3$  at 400 MHz.

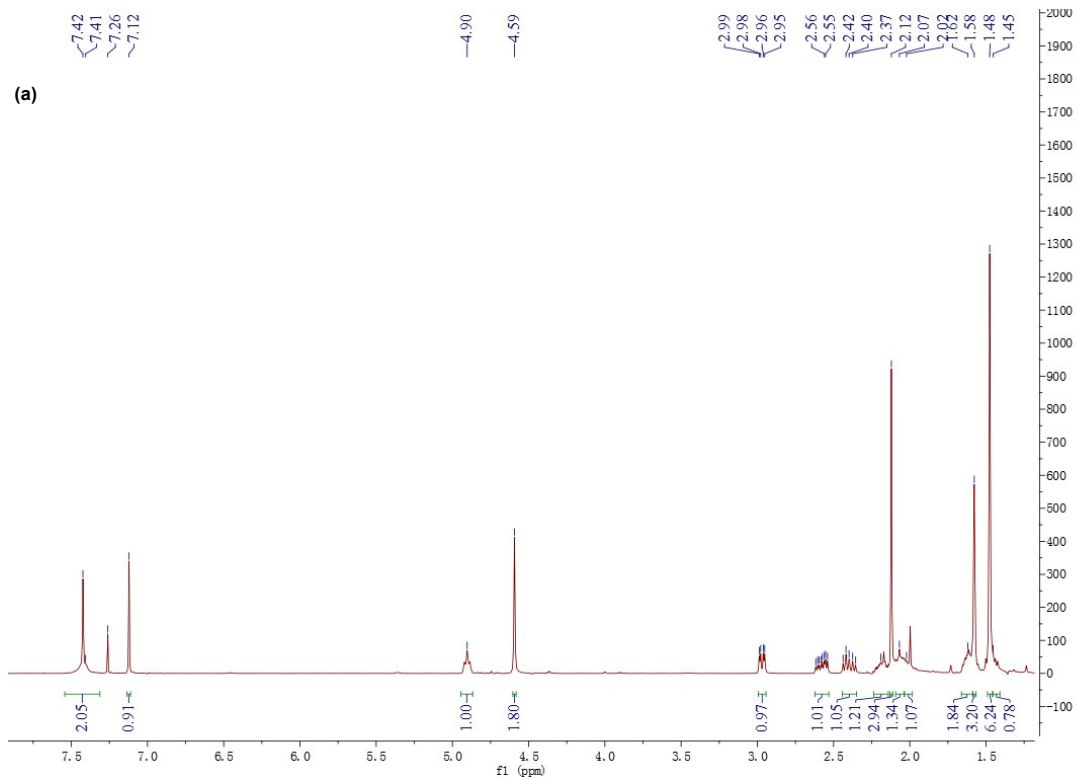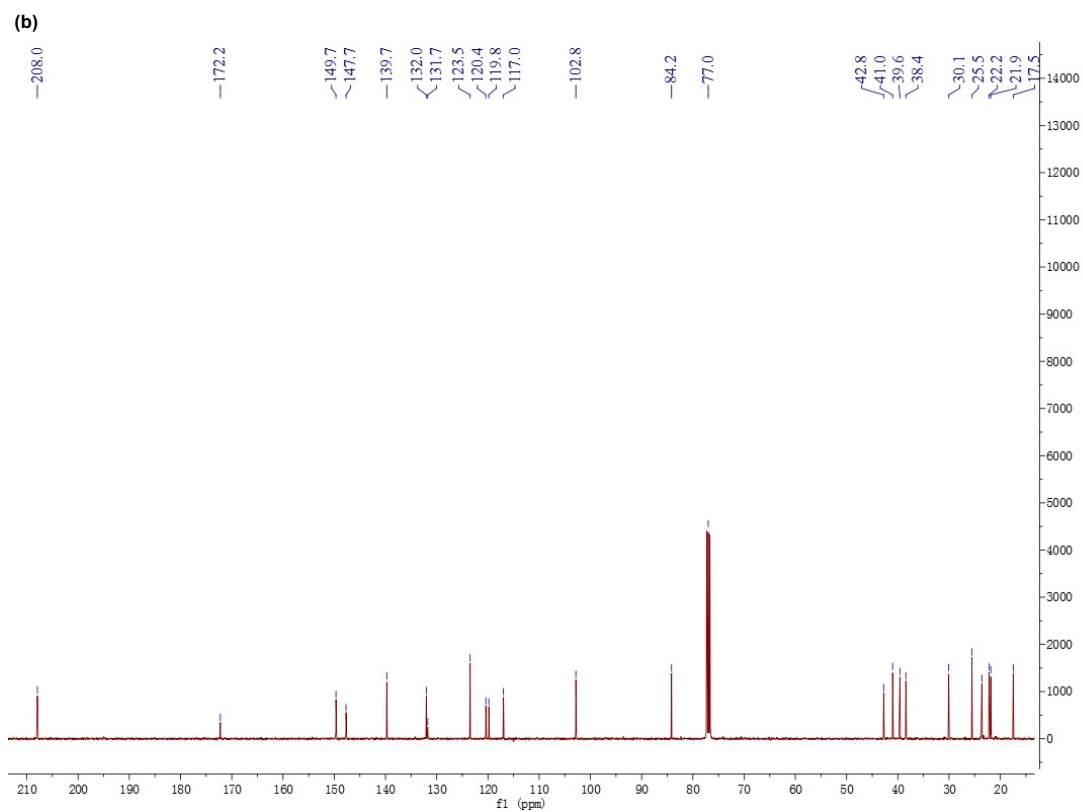

(c)

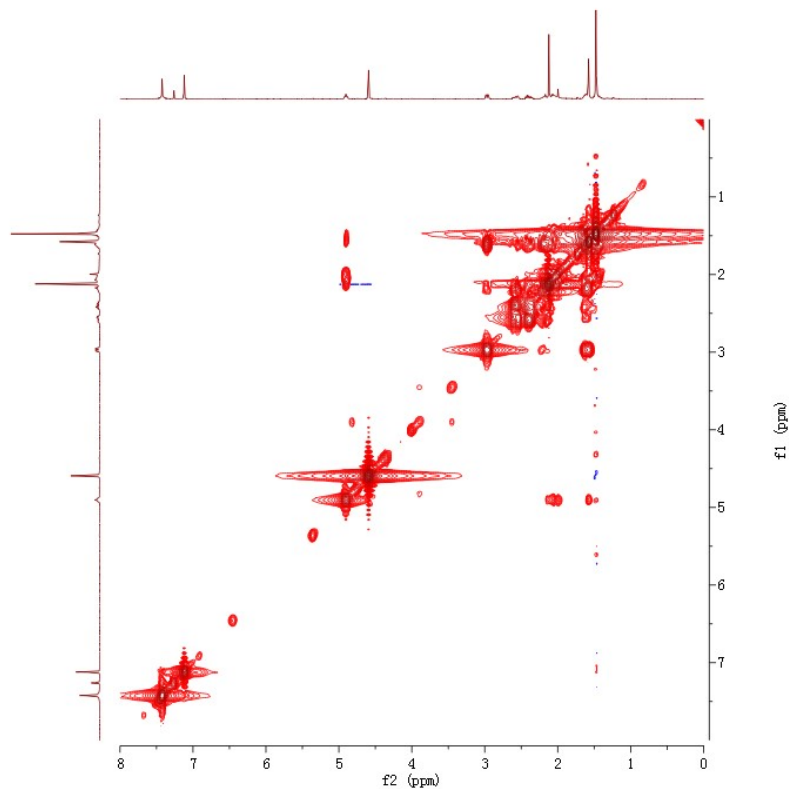

(d)

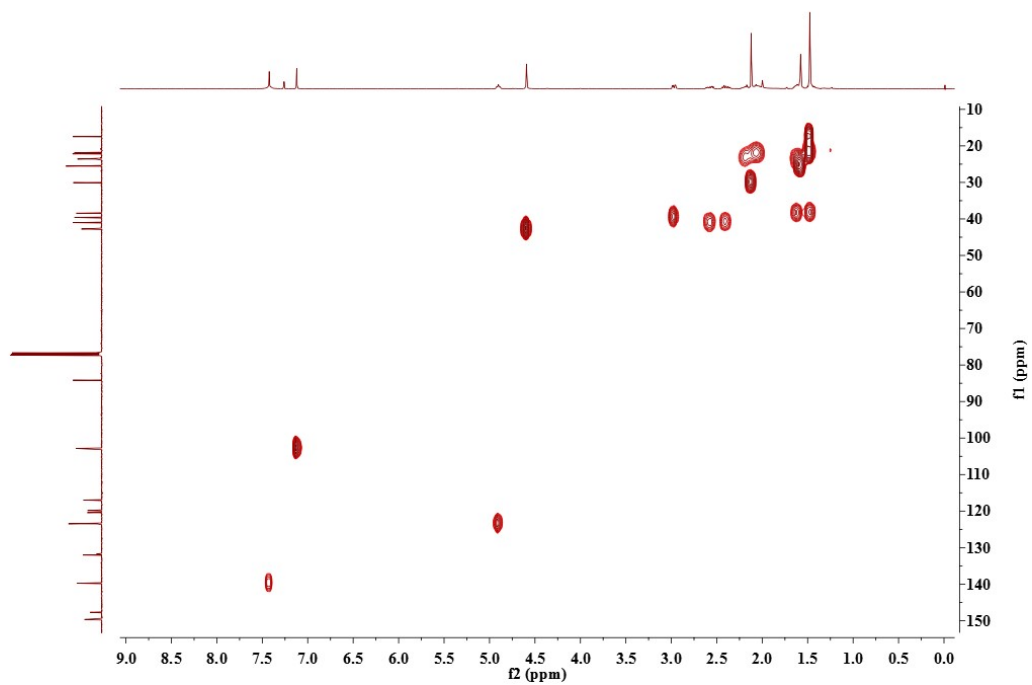



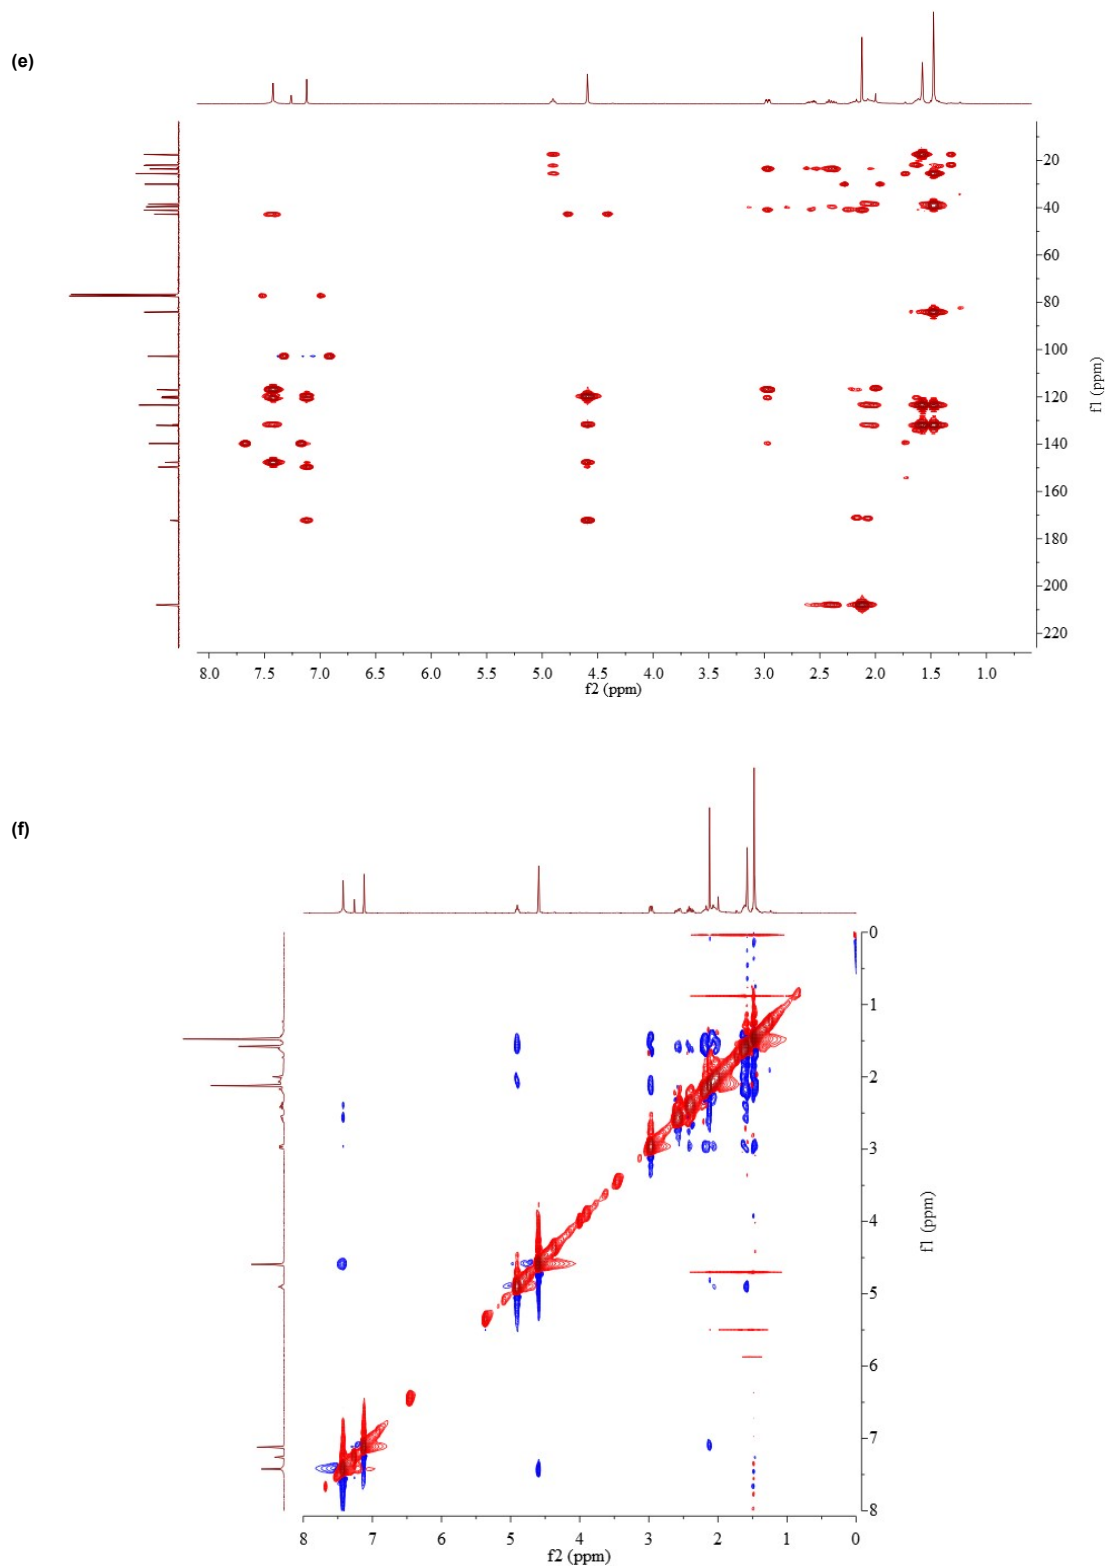

**Fig. S7 NMR spectra of 2**

(a)  $^1\text{H}$  NMR spectrum in  $\text{CDCl}_3$  at 400 MHz; (b)  $^{13}\text{C}$  NMR spectrum in  $\text{CDCl}_3$  at 100 MHz; (c)  $^1\text{H}$ - $^1\text{H}$  COSY spectrum in  $\text{CDCl}_3$  at 400 MHz; (d) HSQC spectrum in  $\text{CDCl}_3$  at 400 MHz; (e) HMBC spectrum in  $\text{CDCl}_3$  at 400 MHz; (f) ROESY spectrum in  $\text{CDCl}_3$  at 400 MHz.

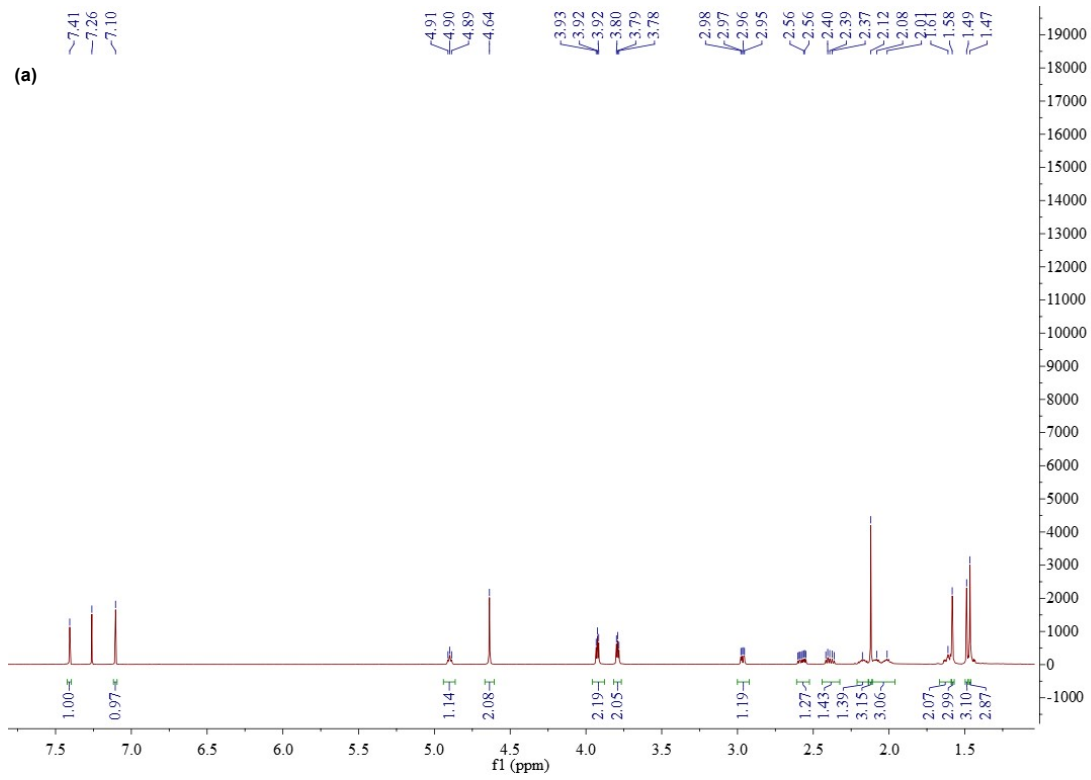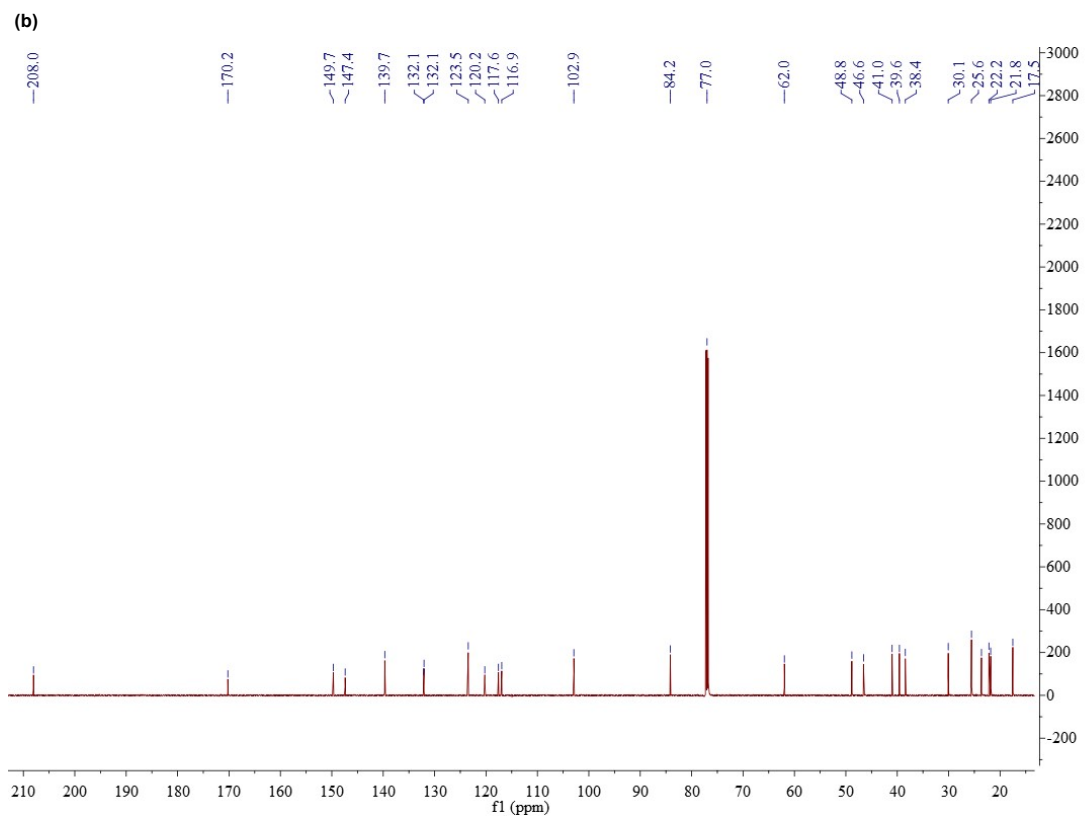

(c)

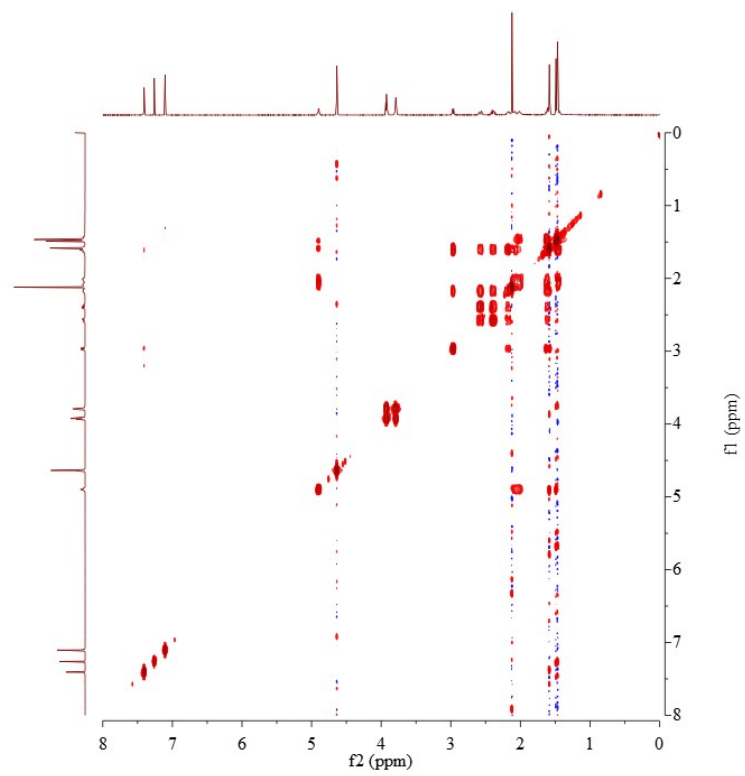

(d)

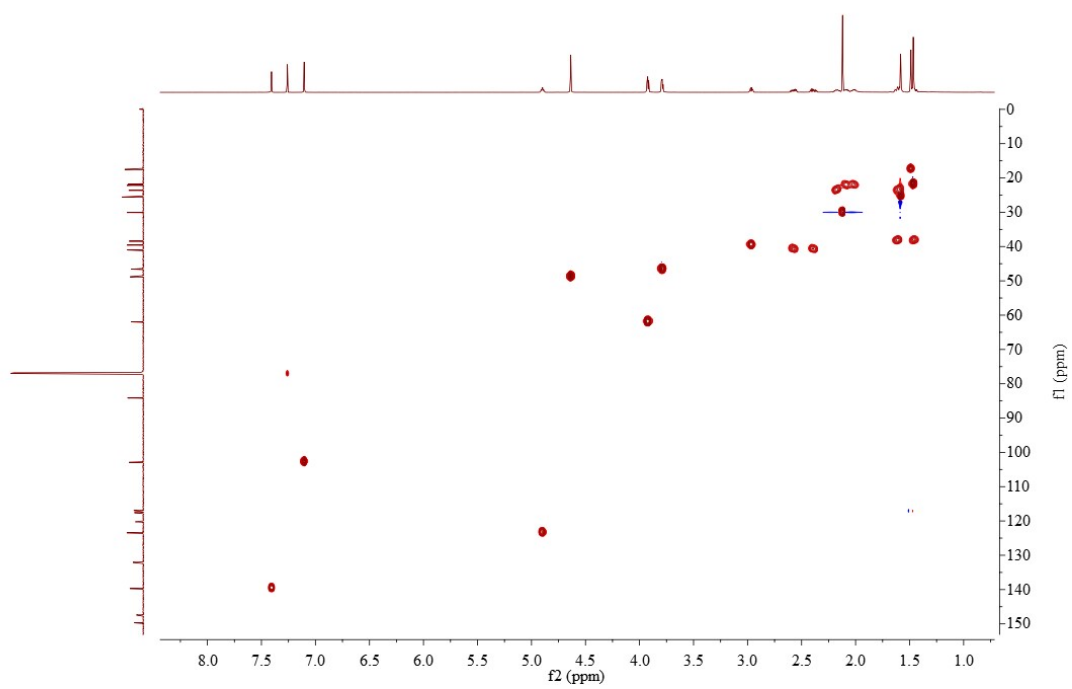

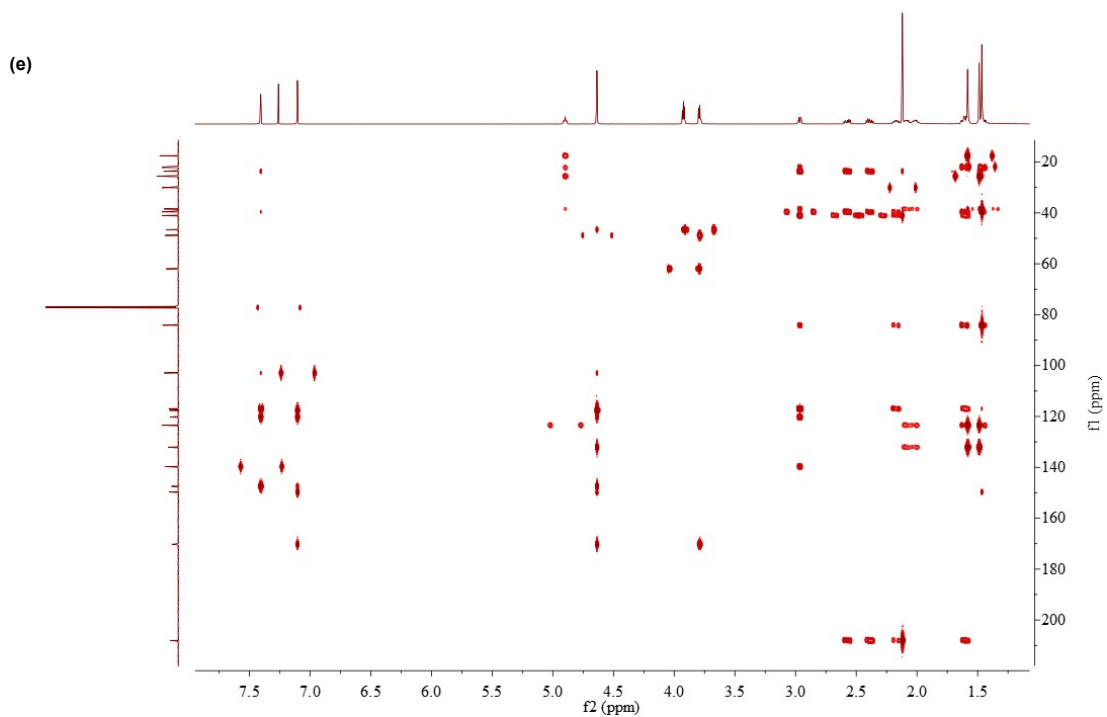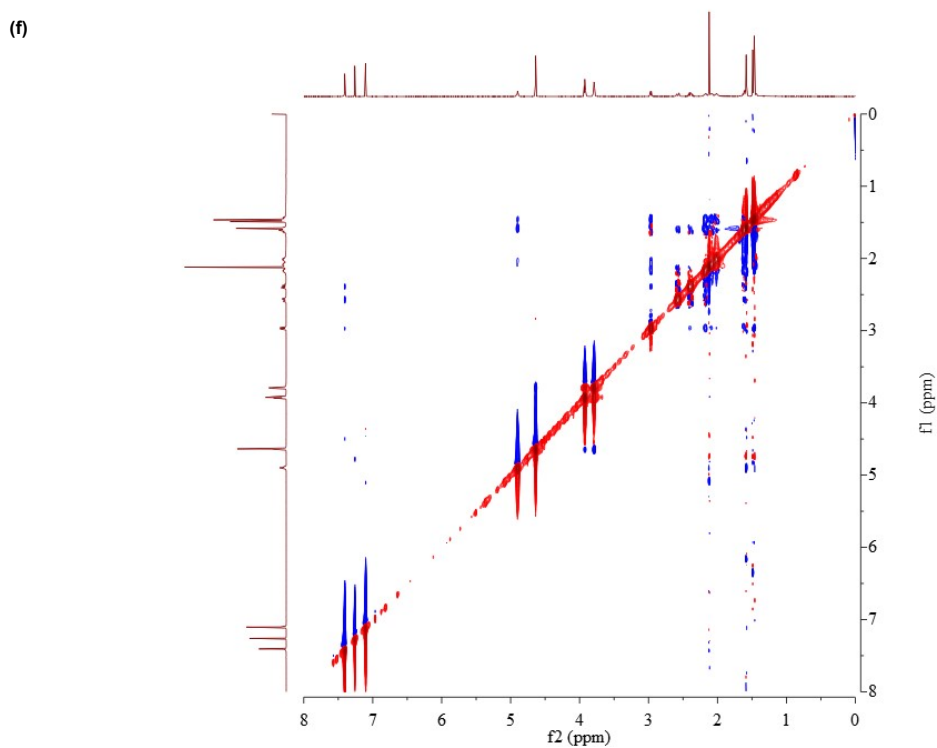

**Fig. S8 NMR spectra of 3**

(a)  $^1\text{H}$  NMR spectrum in  $\text{CDCl}_3$  at 600 MHz; (b)  $^{13}\text{C}$  NMR spectrum in  $\text{CDCl}_3$  at 150 MHz; (c)  $^1\text{H}$ - $^1\text{H}$  COSY spectrum in  $\text{CDCl}_3$  at 600 MHz; (d) HSQC spectrum in  $\text{CDCl}_3$  at 600 MHz; (e) HMBC spectrum in  $\text{CDCl}_3$  at 600 MHz; (f) ROESY spectrum in  $\text{CDCl}_3$  at 600 MHz.

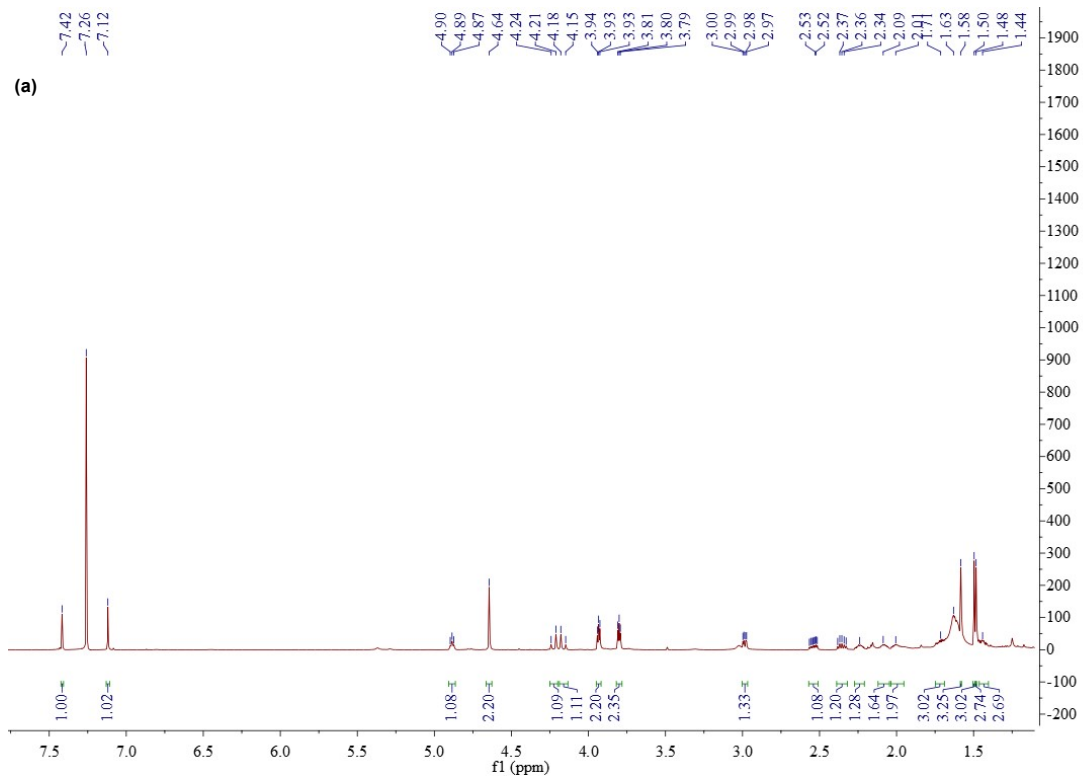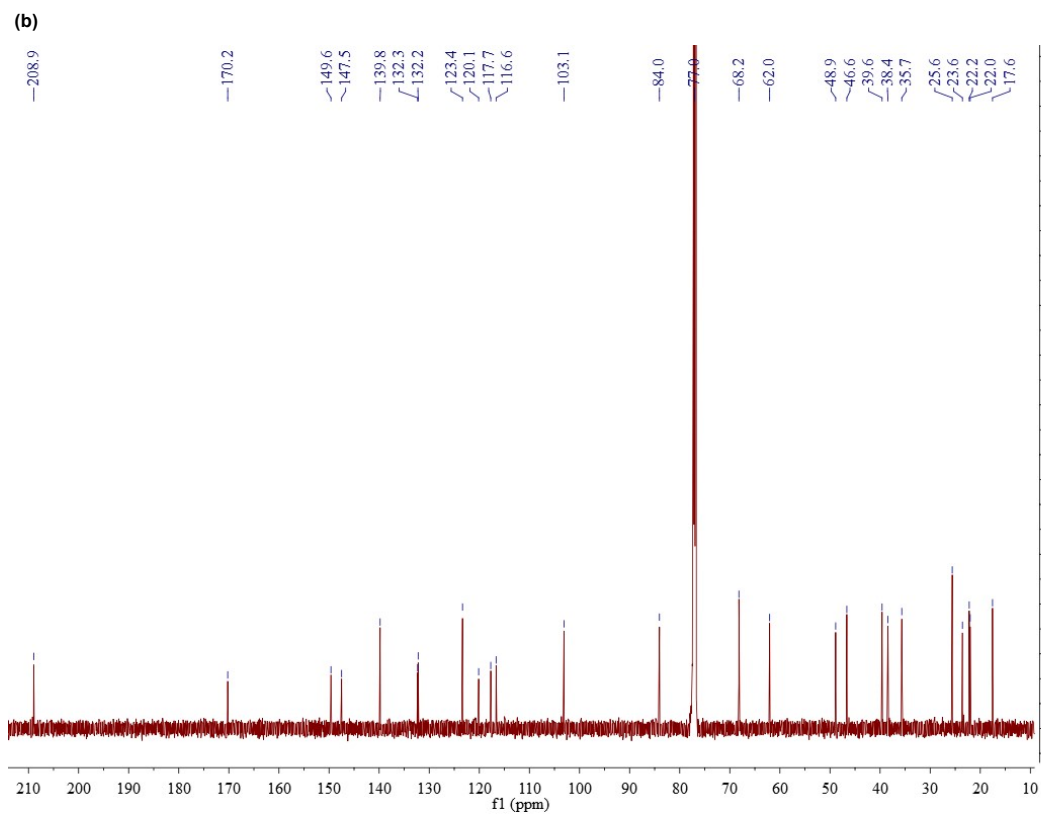

(c)

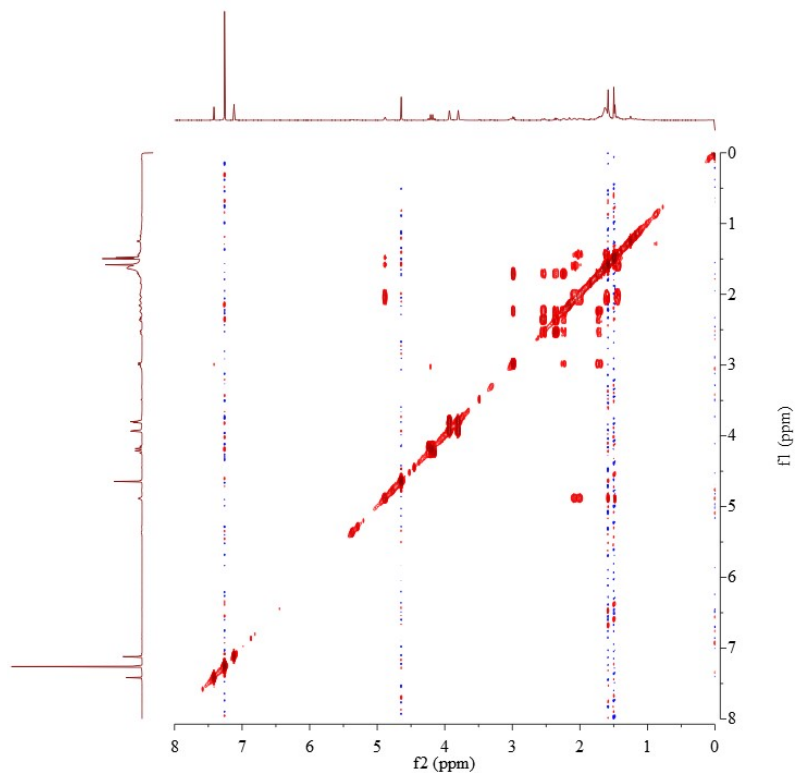

(d)

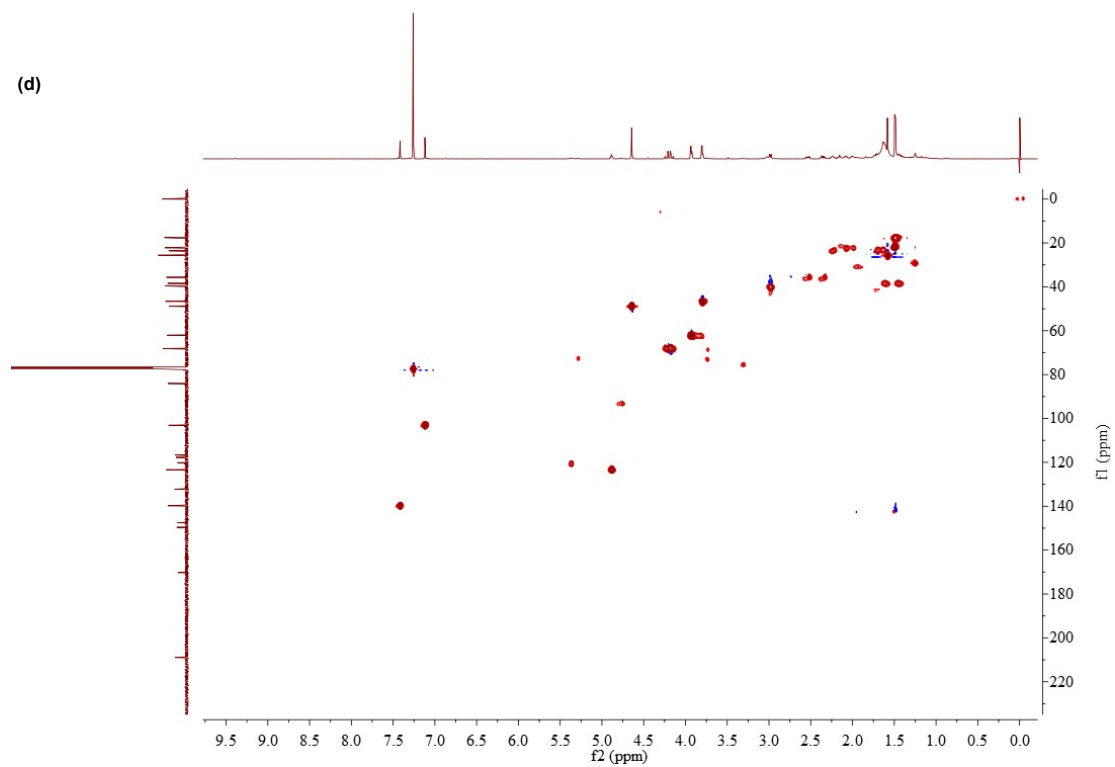

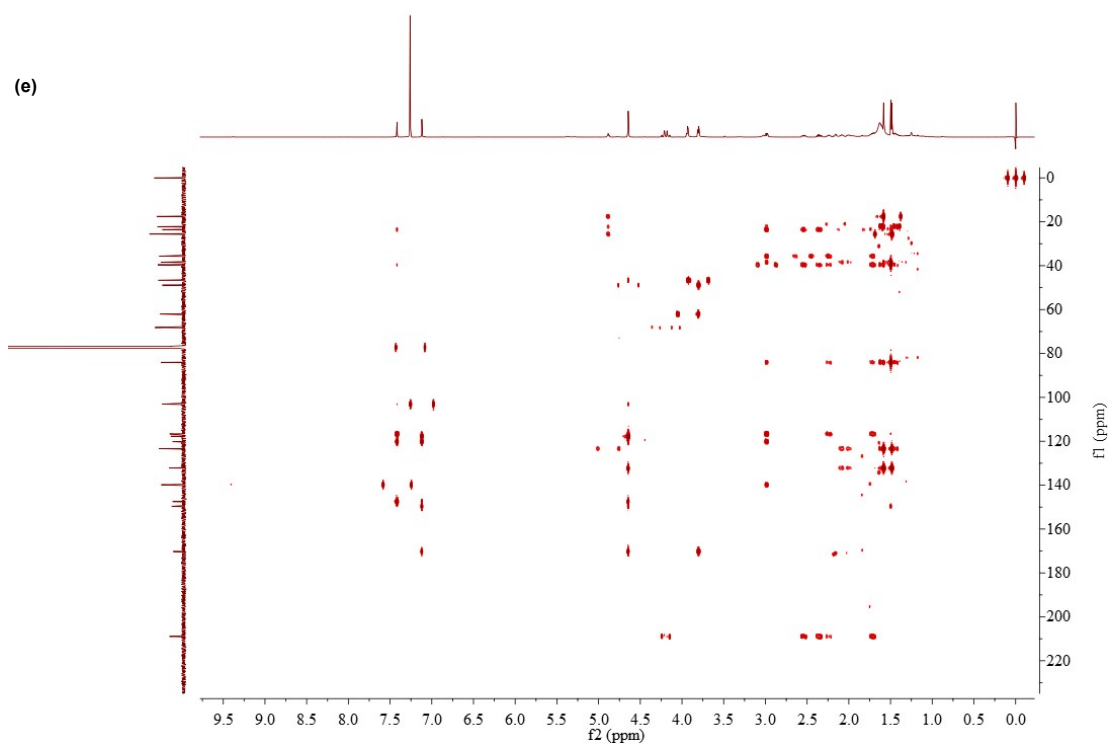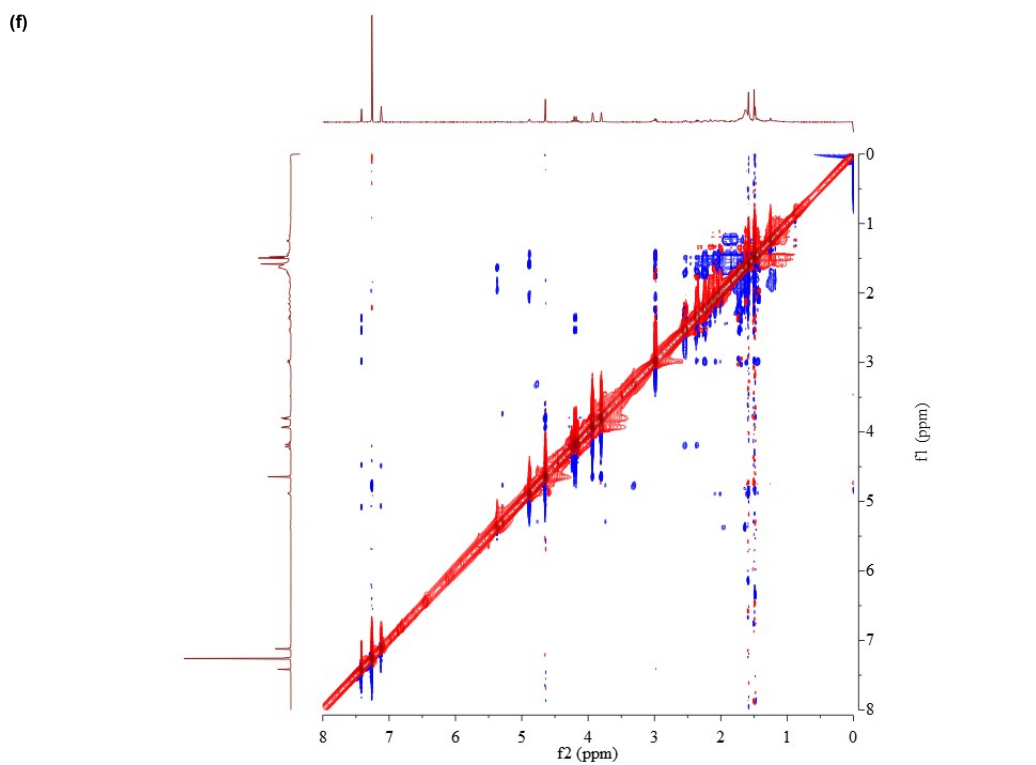

**Fig. S9 NMR spectra of 4**

(a)  $^1\text{H}$  NMR spectrum in  $\text{CDCl}_3$  at 600 MHz; (b)  $^{13}\text{C}$  NMR spectrum in  $\text{CDCl}_3$  at 150 MHz; (c)  $^1\text{H}$ - $^1\text{H}$  COSY spectrum in  $\text{CDCl}_3$  at 600 MHz; (d) HSQC spectrum in  $\text{CDCl}_3$  at 600 MHz; (e) HMBC spectrum in  $\text{CDCl}_3$  at 600 MHz; (f) ROESY spectrum in  $\text{CDCl}_3$  at 600 MHz.

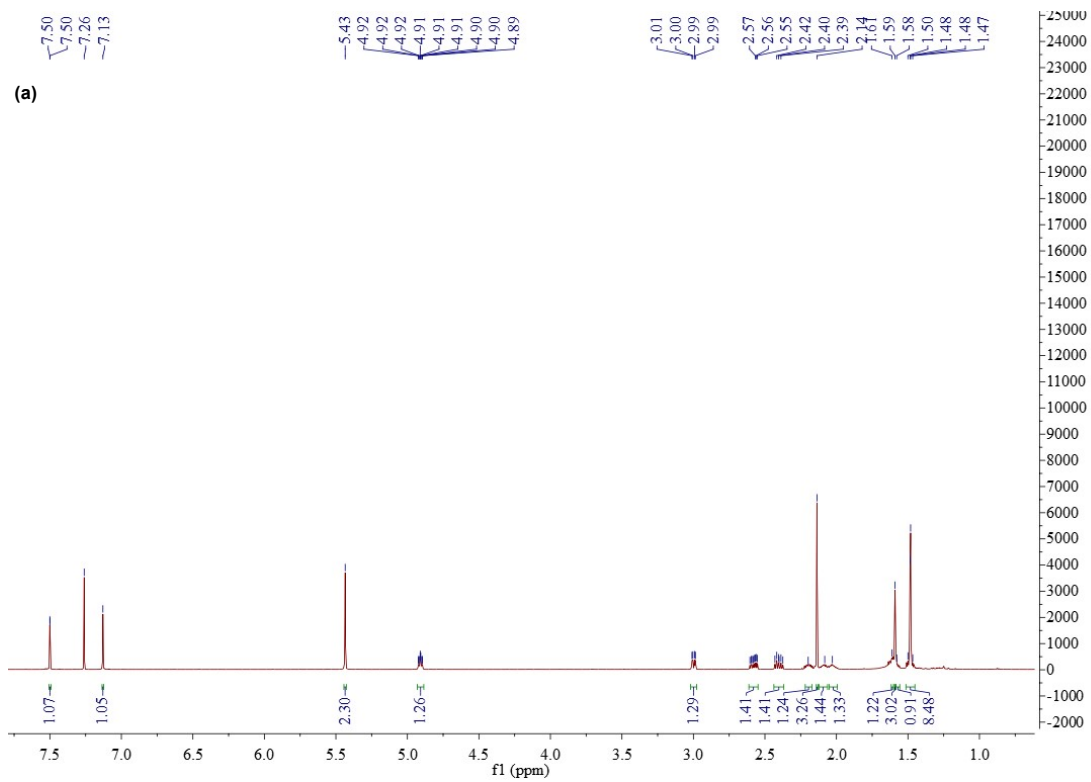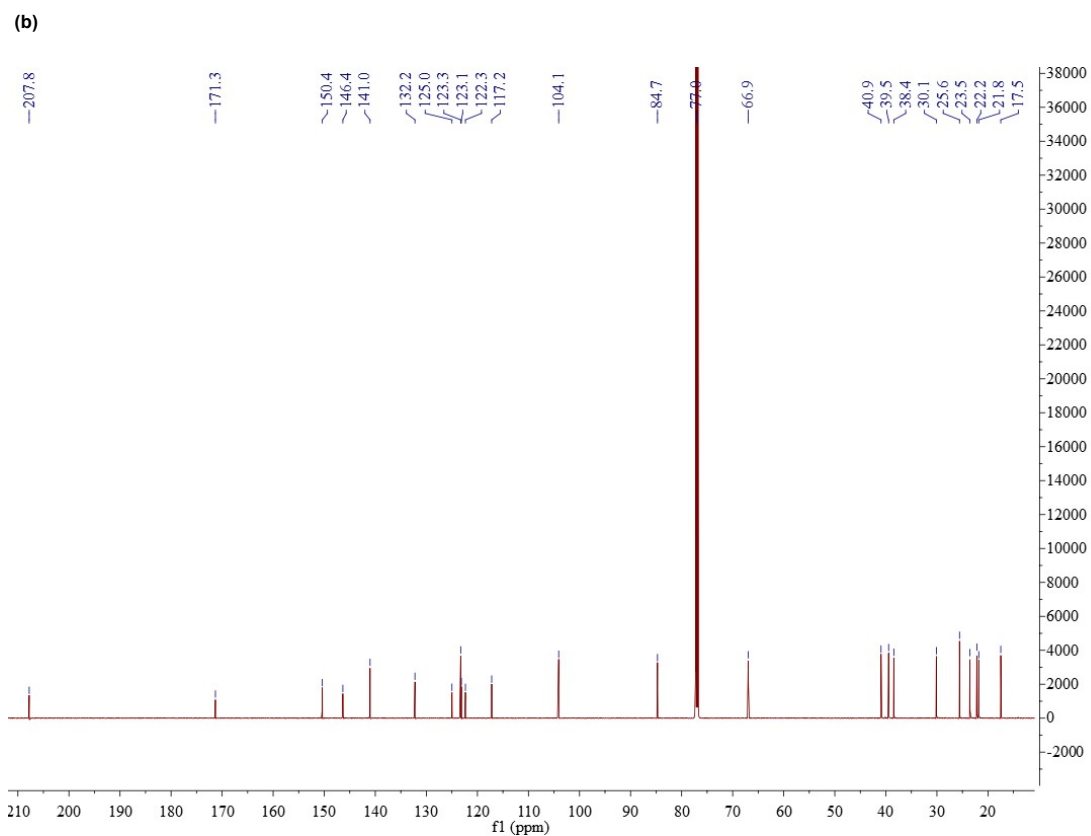



(c)

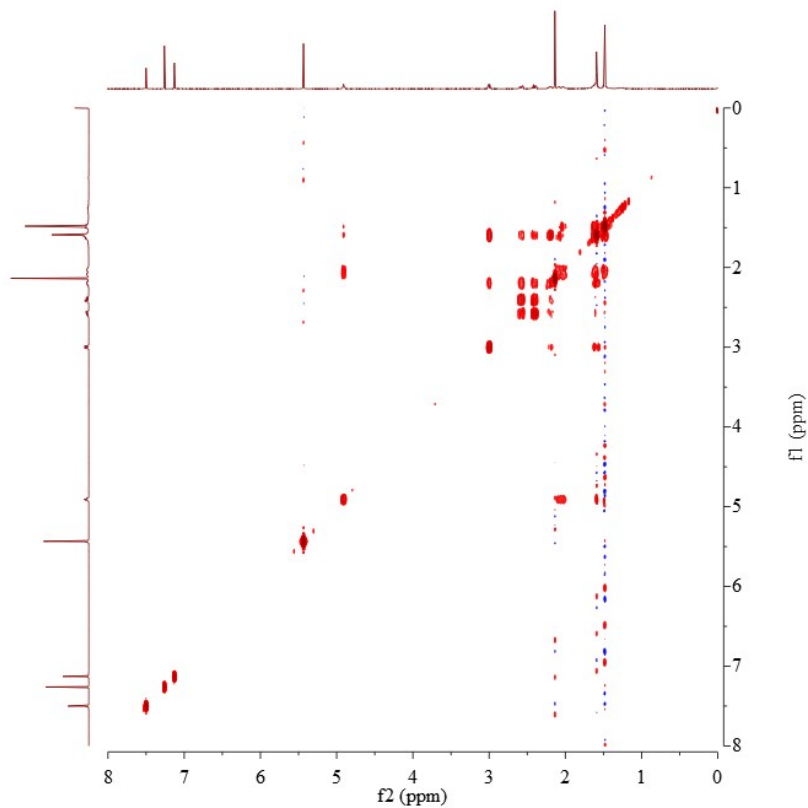

(d)

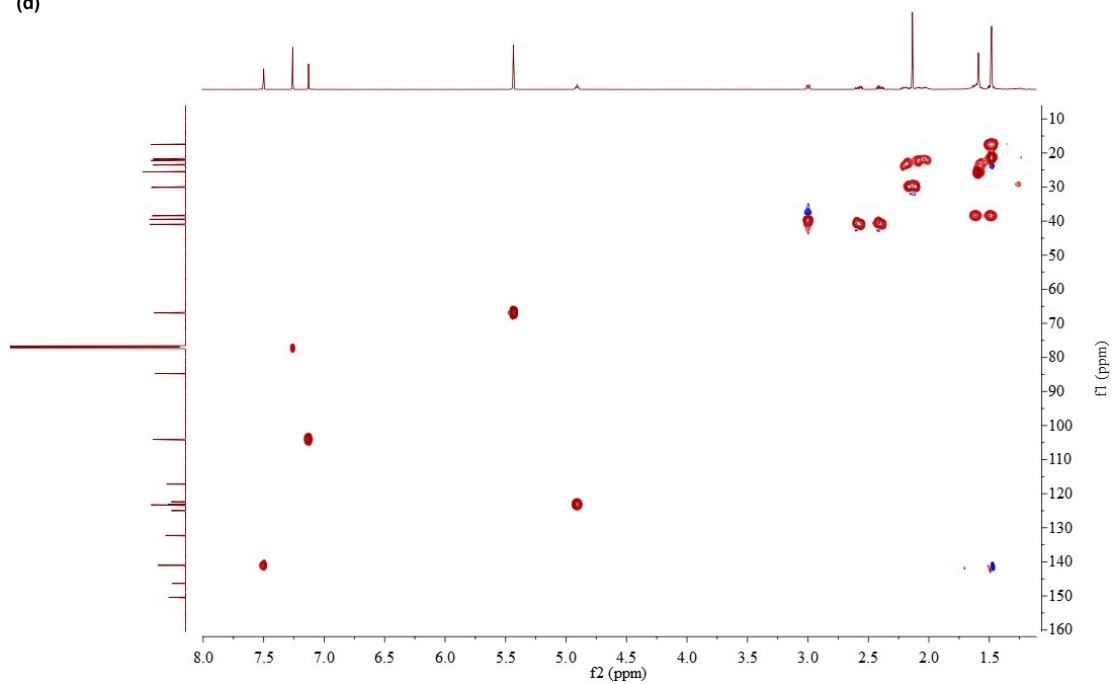

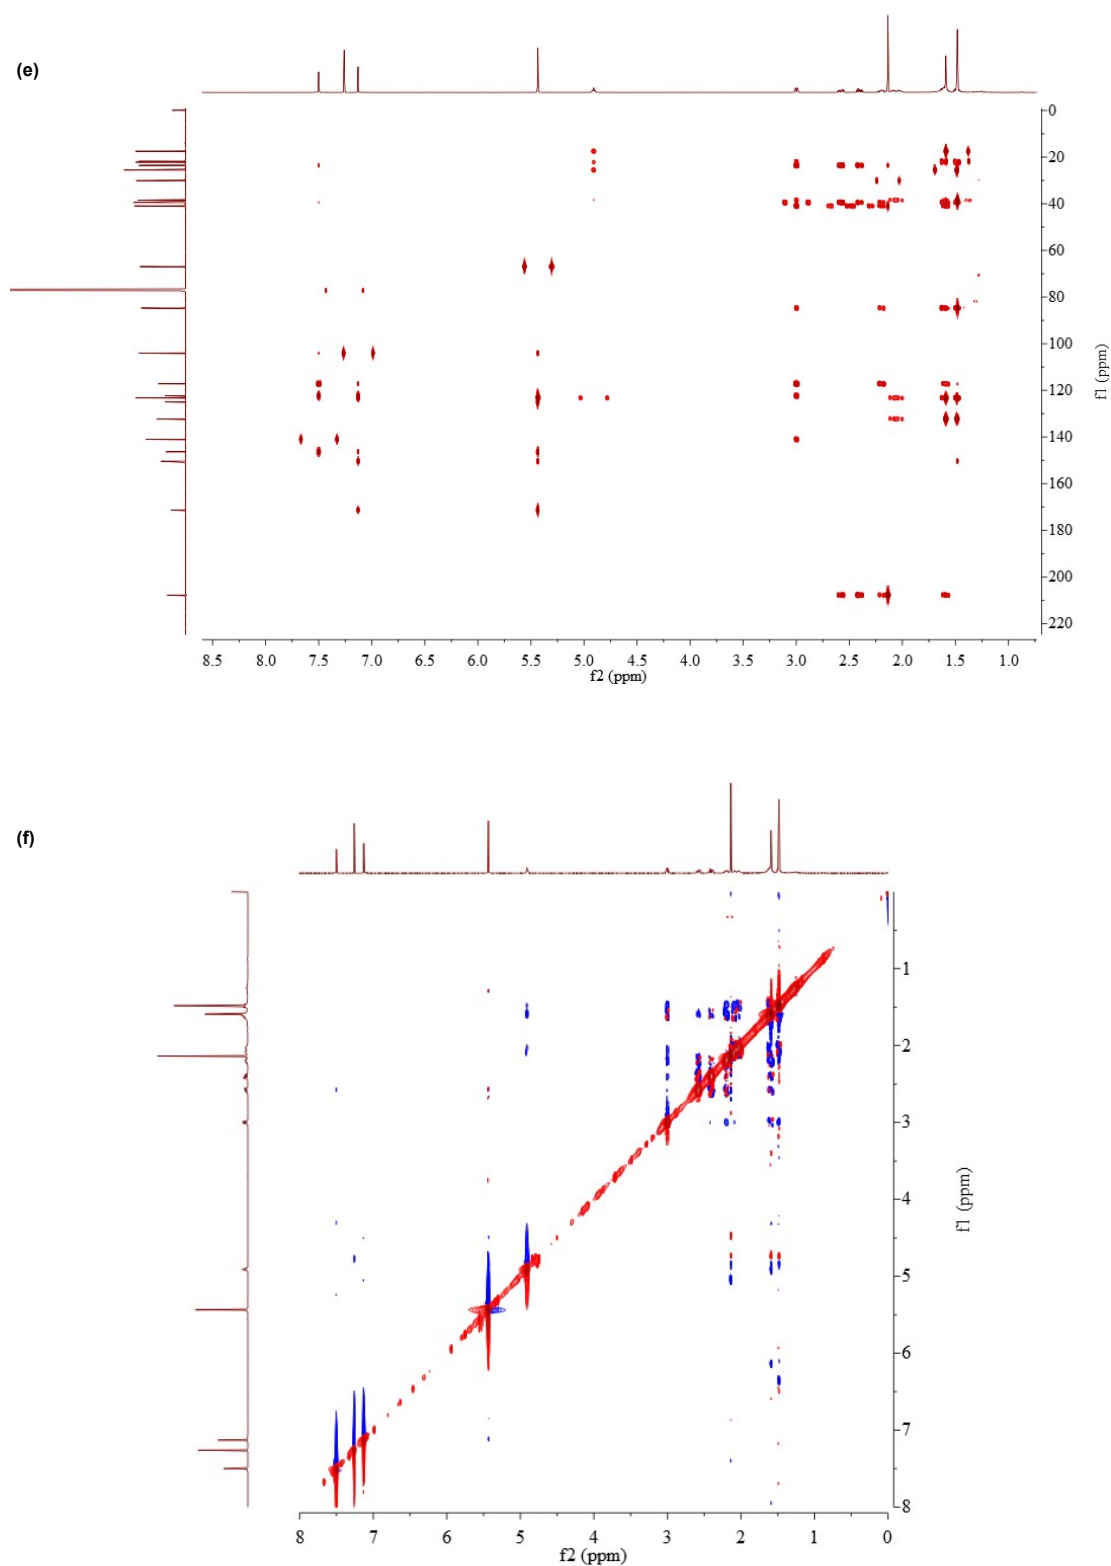

**Fig. S10 NMR spectra of 5**

(a)  $^1\text{H}$  NMR spectrum in  $\text{CDCl}_3$  at 600 MHz; (b)  $^{13}\text{C}$  NMR spectrum in  $\text{CDCl}_3$  at 150 MHz; (c)  $^1\text{H}$ - $^1\text{H}$  COSY spectrum in  $\text{CDCl}_3$  at 600 MHz; (d) HSQC spectrum in  $\text{CDCl}_3$  at 600 MHz; (e) HMBC spectrum in  $\text{CDCl}_3$  at 600 MHz; (f) ROESY spectrum in  $\text{CDCl}_3$  at 600 MHz.

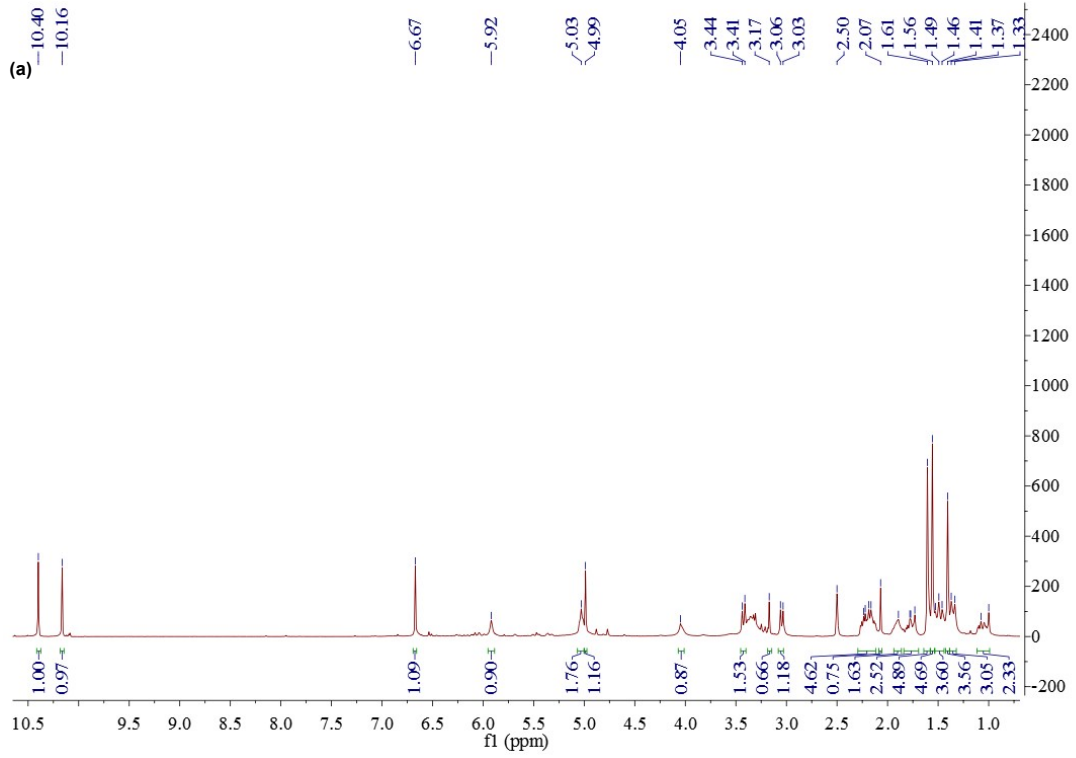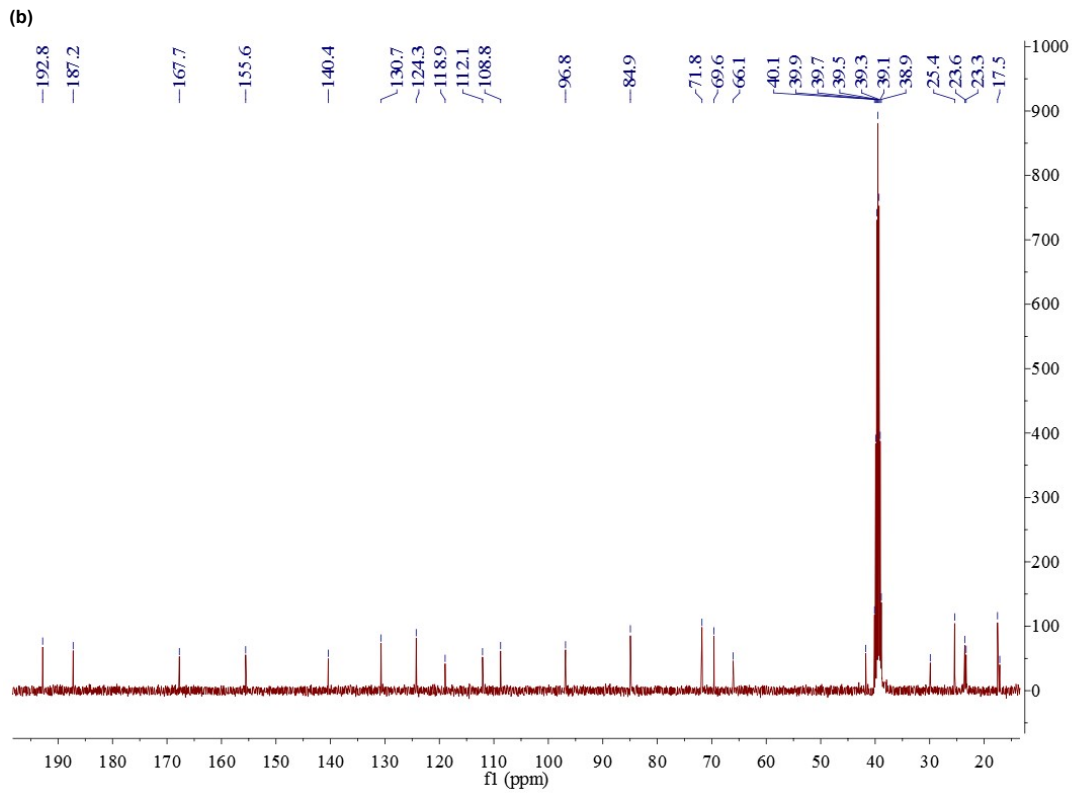

(c)

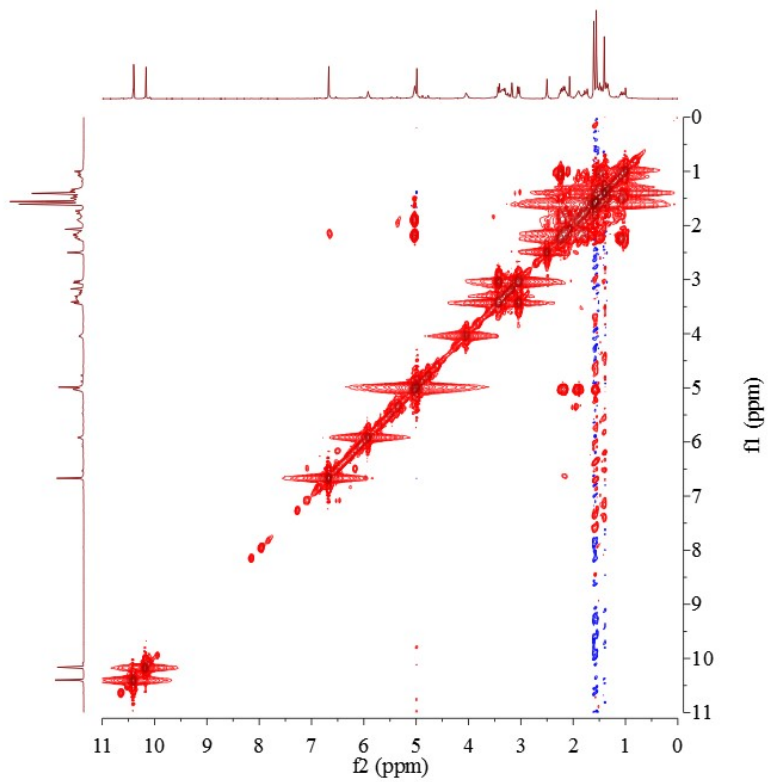

(d)

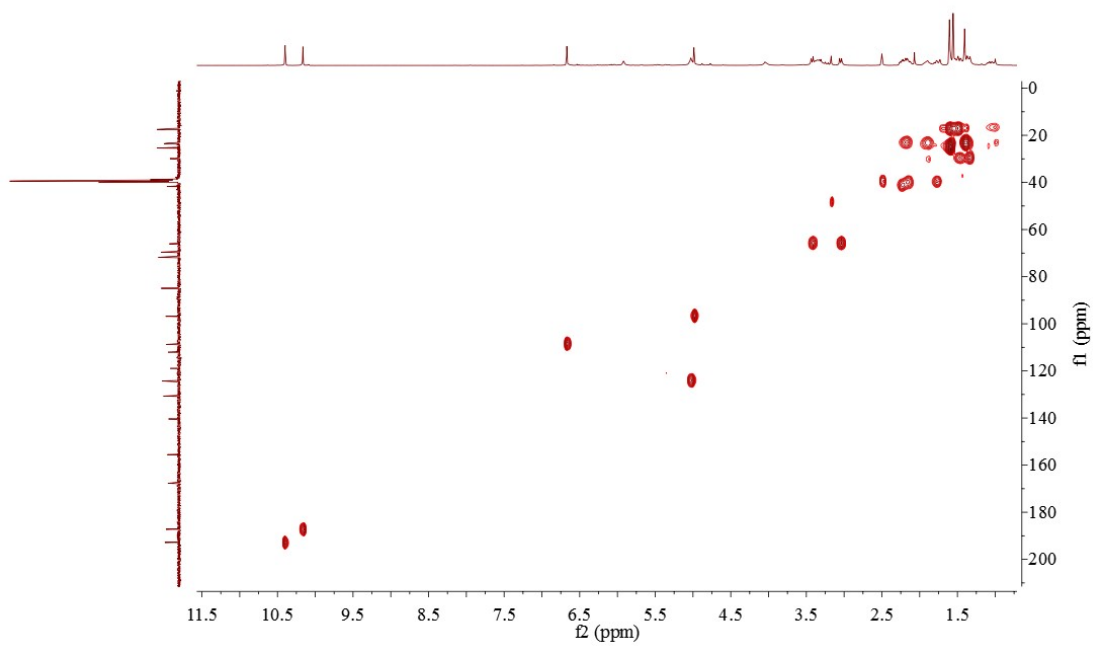

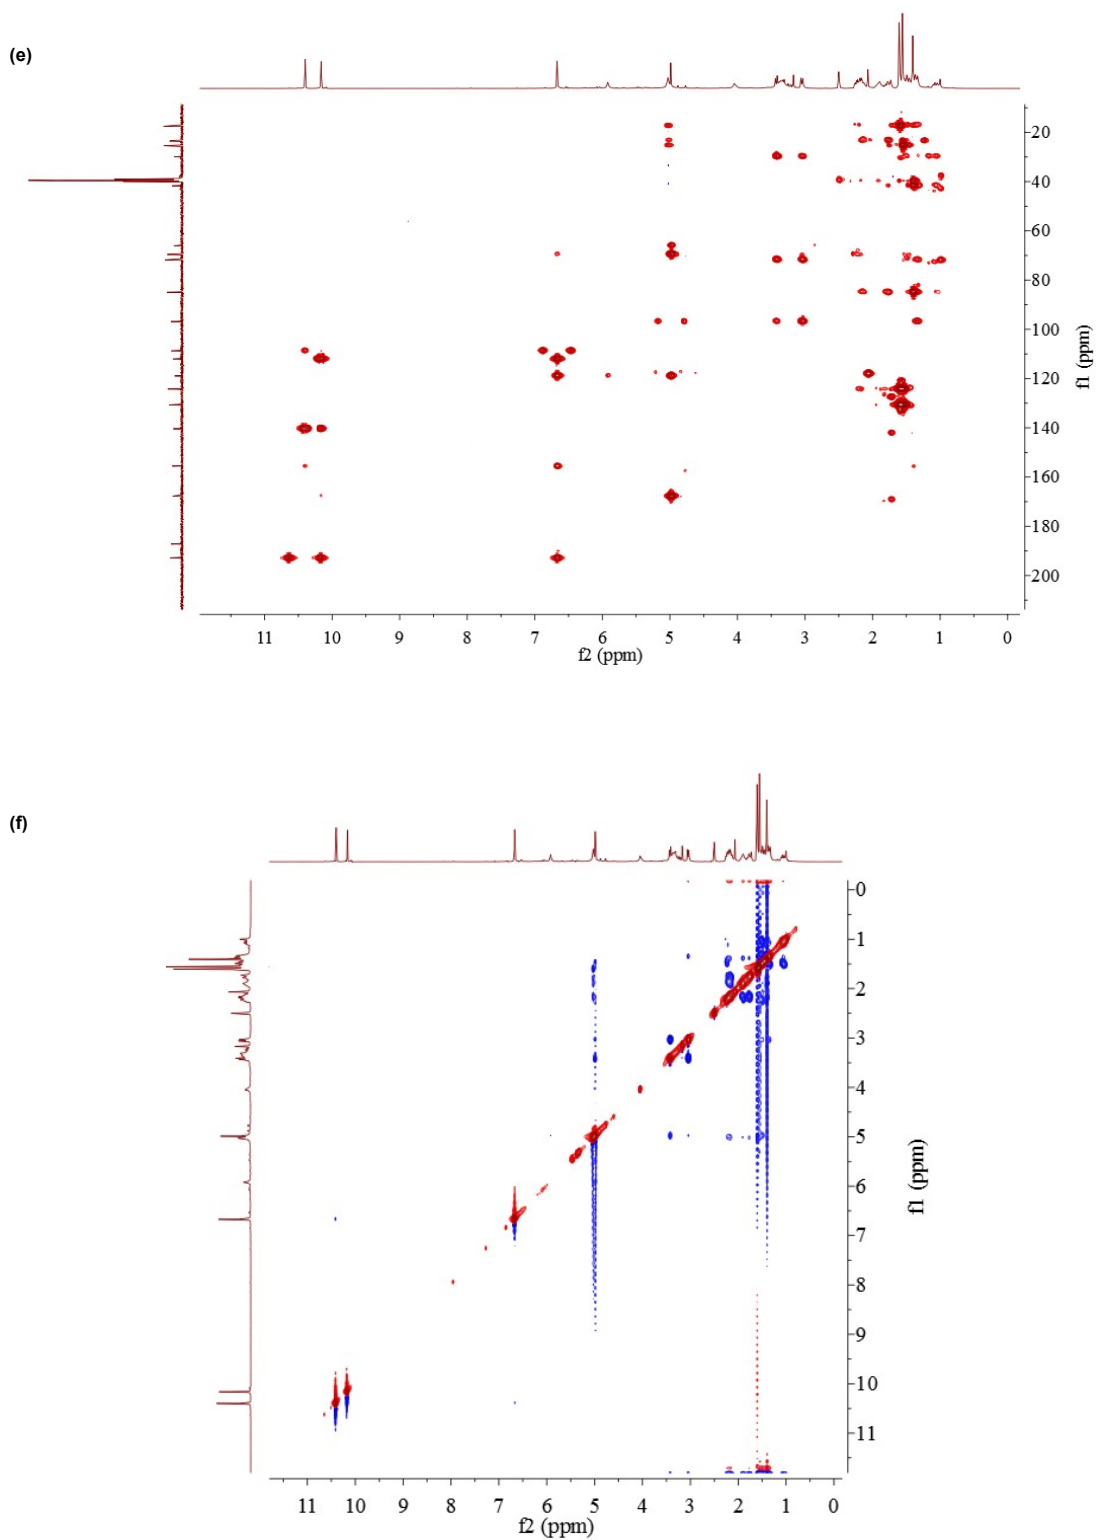

**Fig. S11 NMR spectra of 6**

- (a) <sup>1</sup>H NMR spectrum in DMSO-*d*<sub>6</sub> at 400 MHz; (b) <sup>13</sup>C NMR spectrum in DMSO-*d*<sub>6</sub> at 100 MHz;  
(c) <sup>1</sup>H-<sup>1</sup>H COSY spectrum in DMSO-*d*<sub>6</sub> at 400 MHz; (d) HSQC spectrum in DMSO-*d*<sub>6</sub> at 400 MHz;  
(e) HMBC spectrum in DMSO-*d*<sub>6</sub> at 400 MHz; (f) ROESY spectrum in DMSO-*d*<sub>6</sub> at 400 MHz.

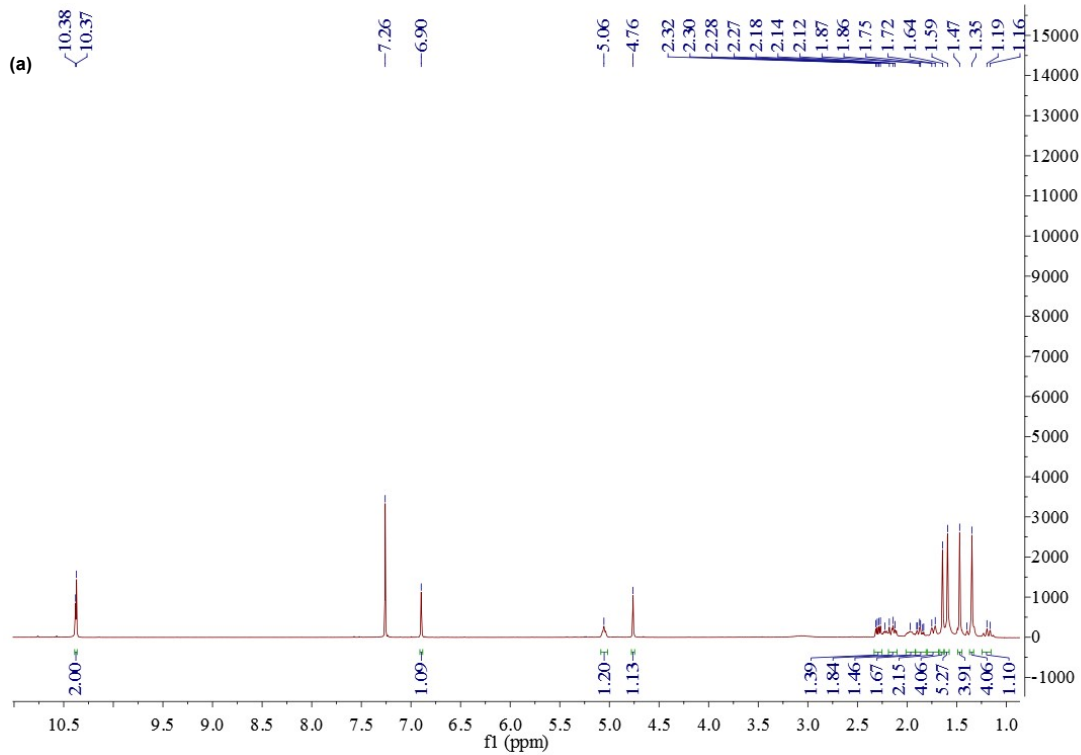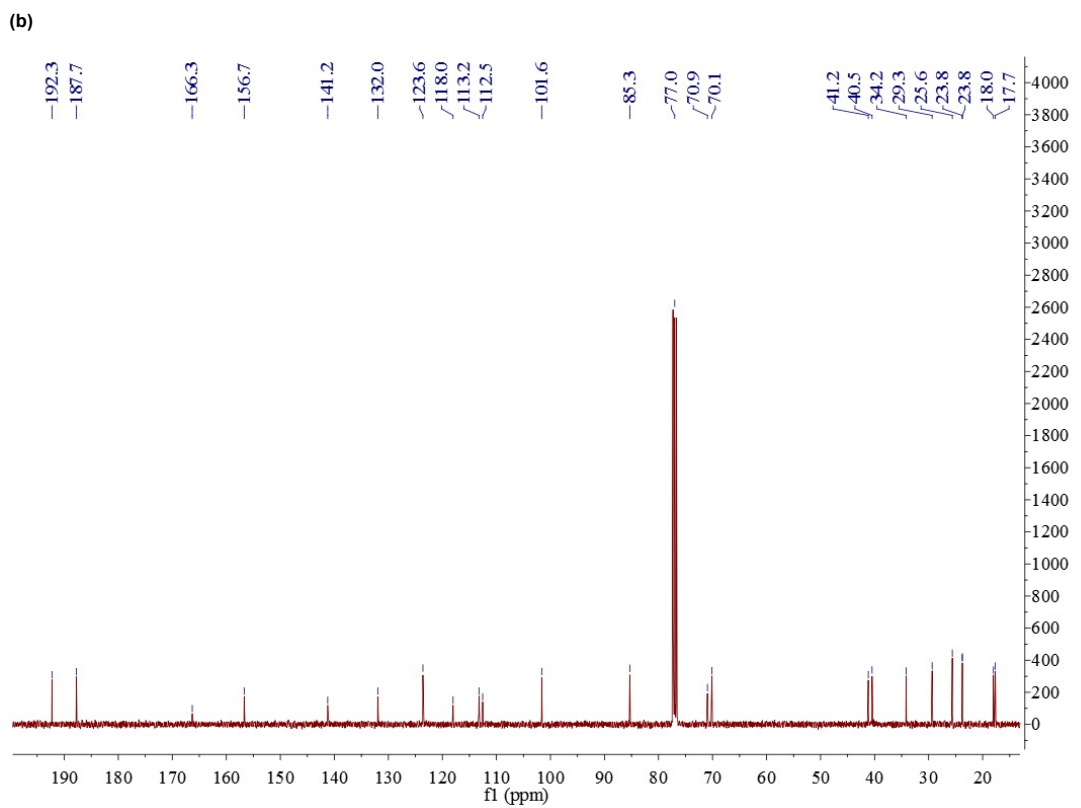

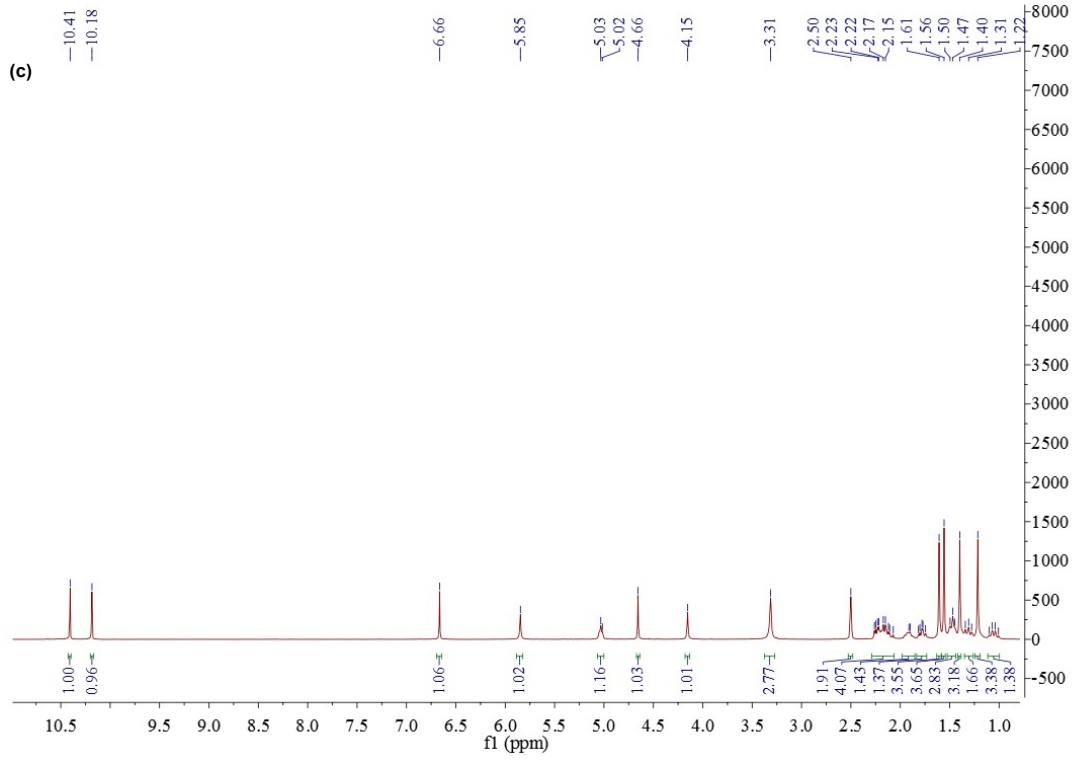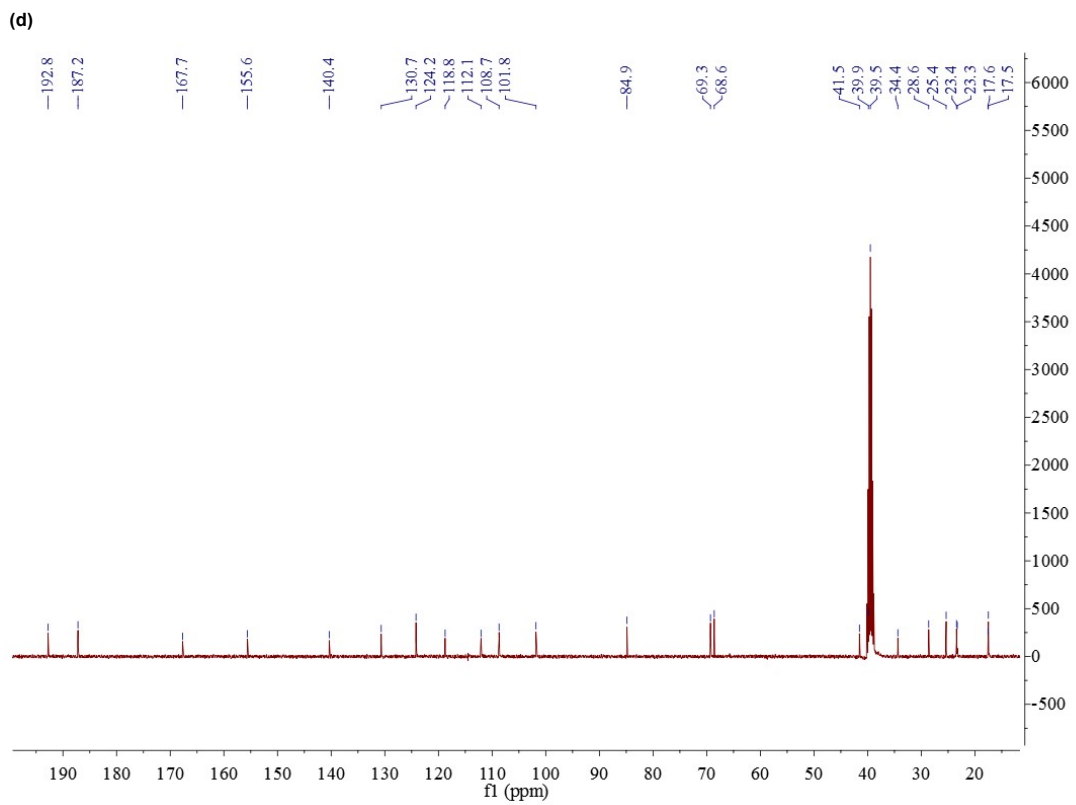

(e)

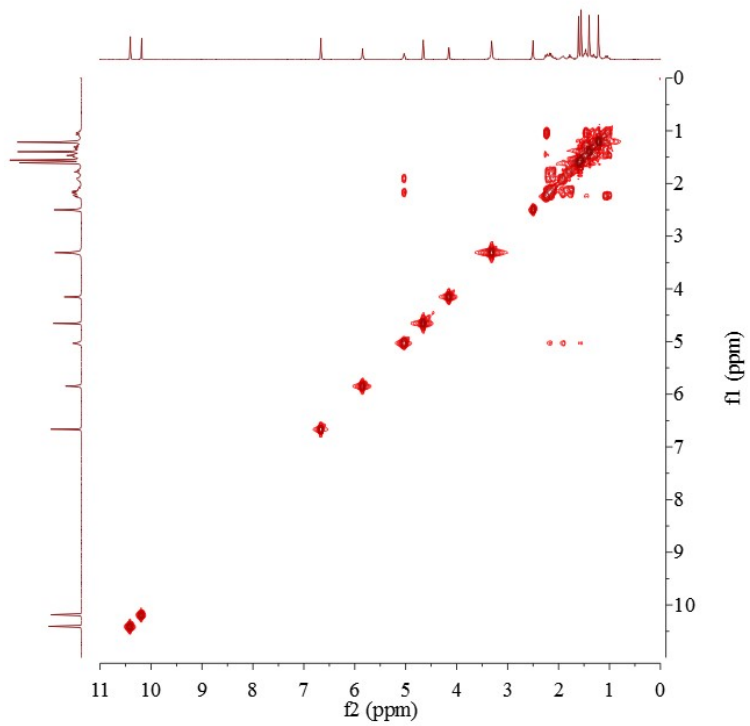

(f)

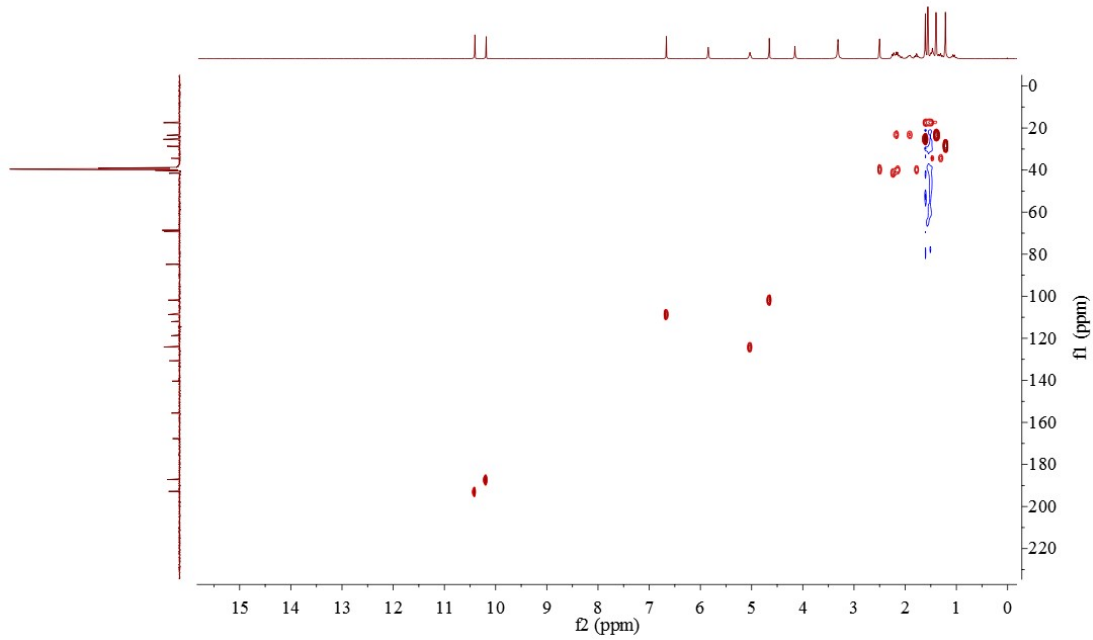



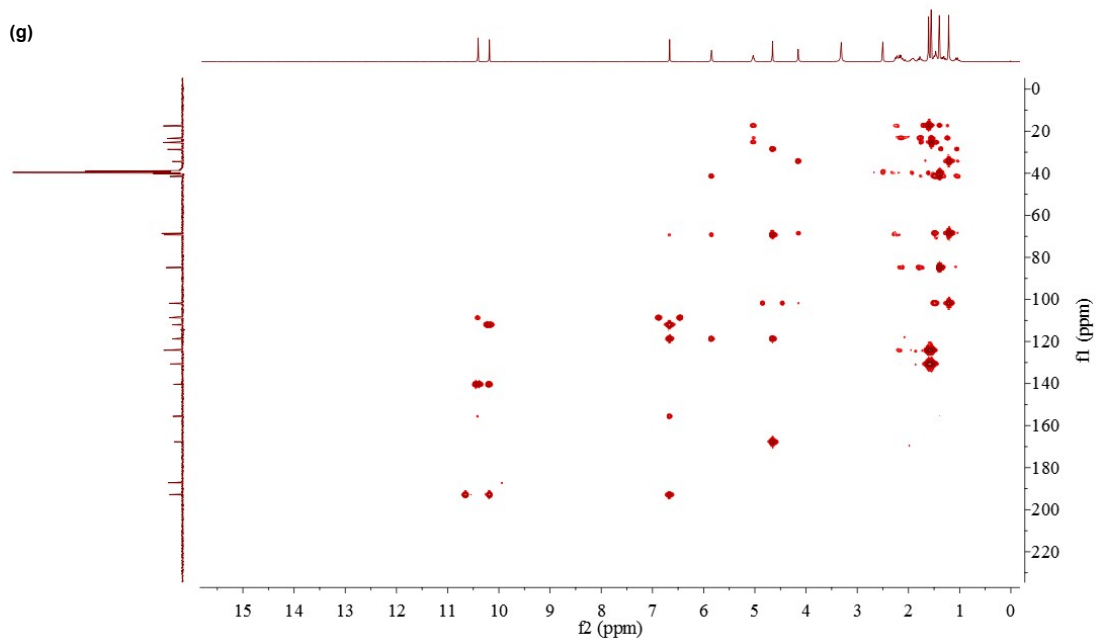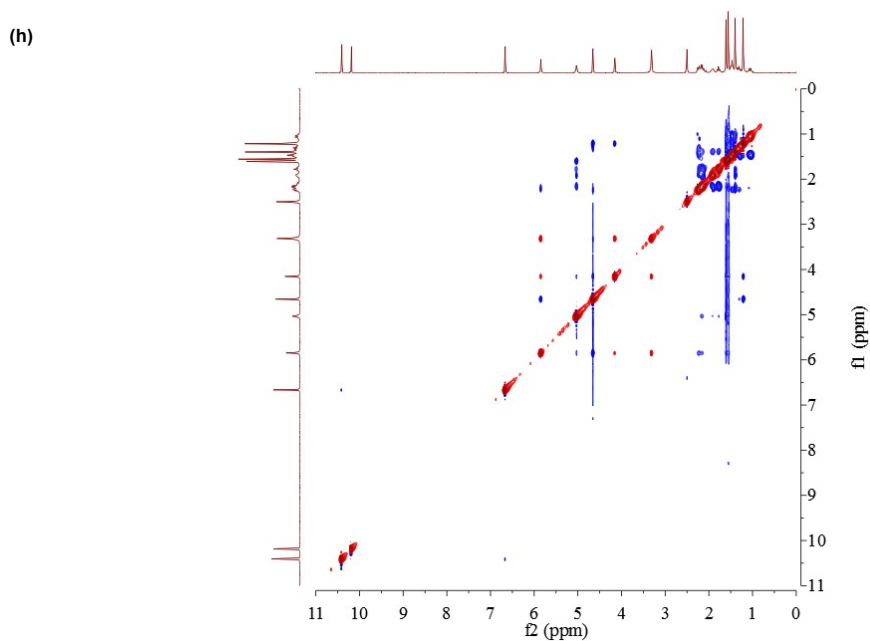

**Fig. S12 NMR spectra of 7**

(a)  $^1\text{H}$  NMR spectrum in  $\text{CDCl}_3$  at 400 MHz; (b)  $^{13}\text{C}$  NMR spectrum in  $\text{CDCl}_3$  at 100 MHz; (c)  $^1\text{H}$  NMR spectrum in  $\text{DMSO}-d_6$  at 400 MHz; (d)  $^{13}\text{C}$  NMR spectrum in  $\text{DMSO}-d_6$  at 100 MHz; (e)  $^1\text{H}$ - $^1\text{H}$  COSY spectrum in  $\text{DMSO}-d_6$  at 400 MHz; (f) HSQC spectrum in  $\text{DMSO}-d_6$  at 400 MHz; (g) HMBC spectrum in  $\text{DMSO}-d_6$  at 400 MHz; (h) ROESY spectrum in  $\text{DMSO}-d_6$  at 400 MHz.

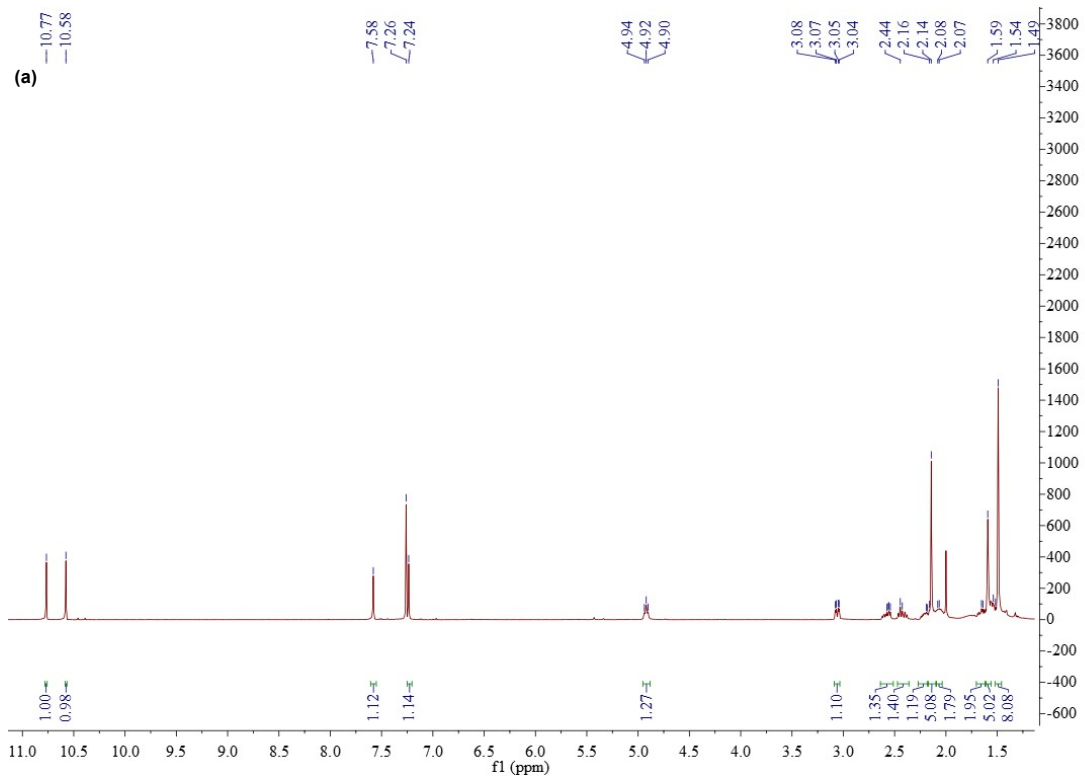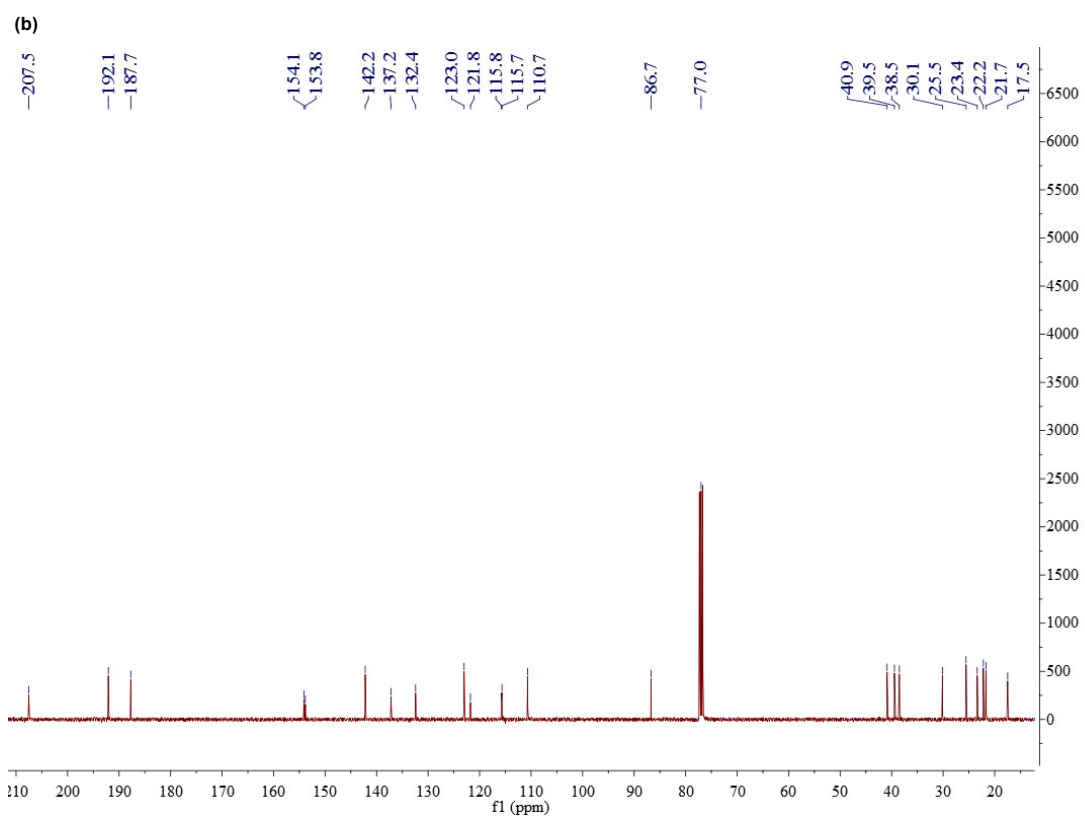

(c)

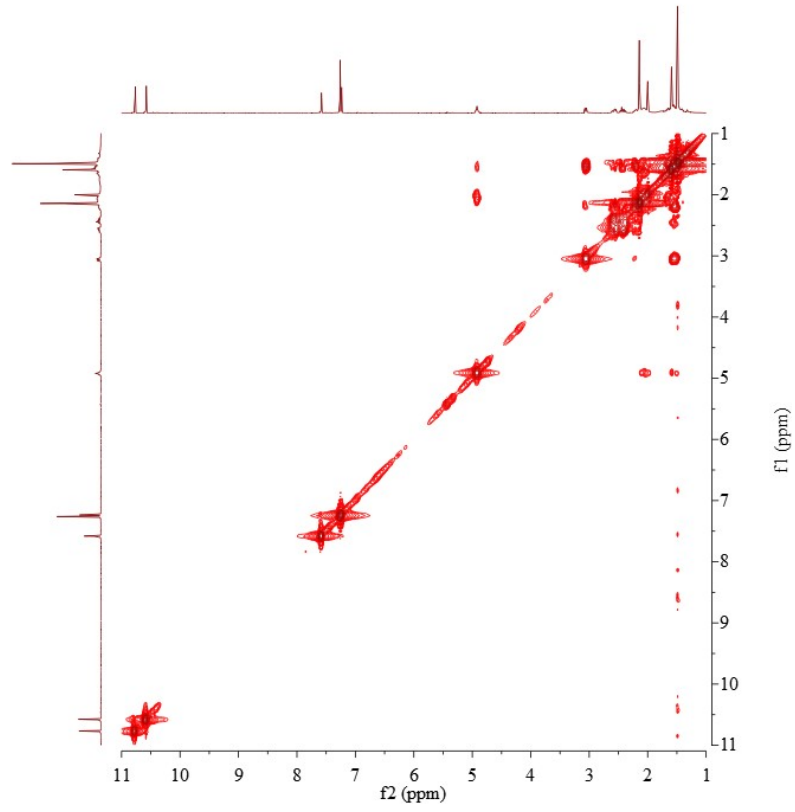

(d)

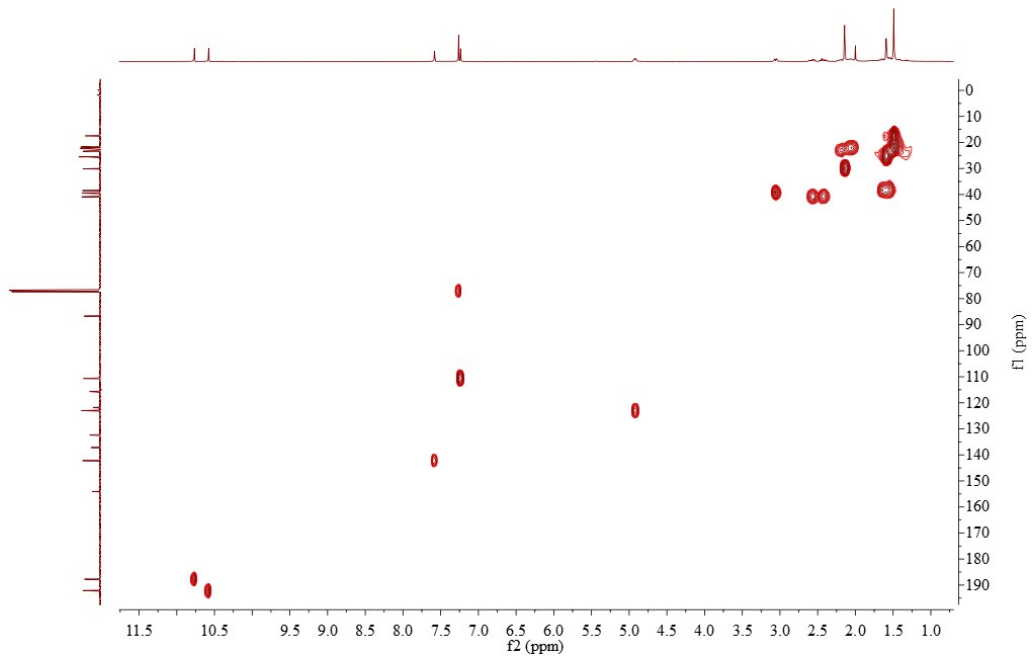

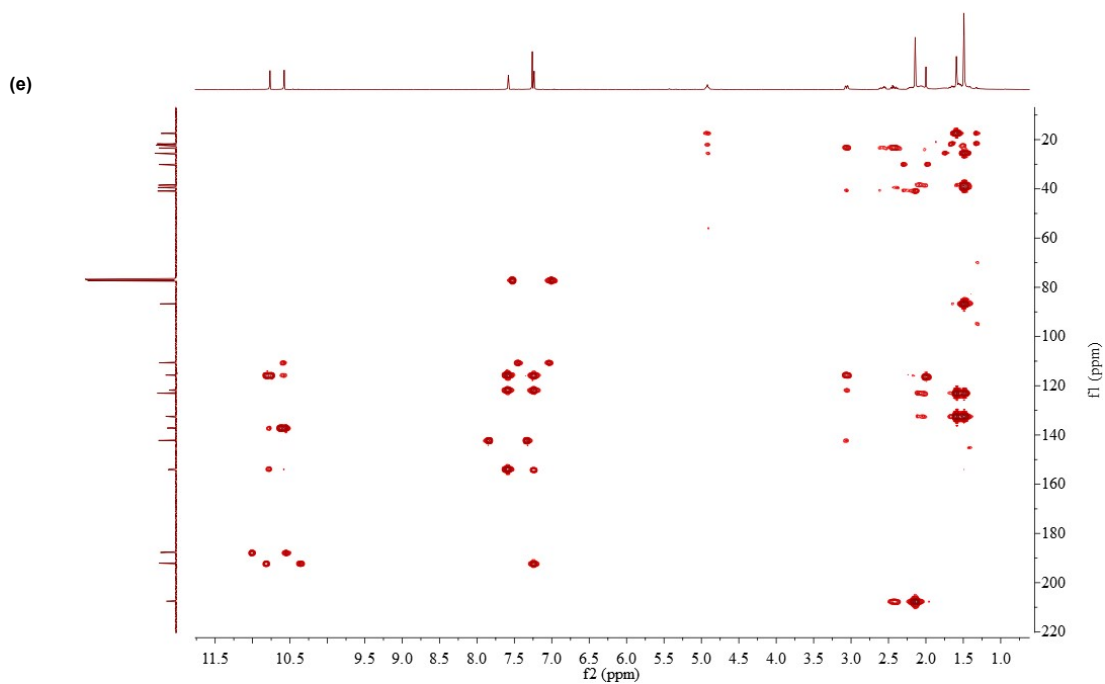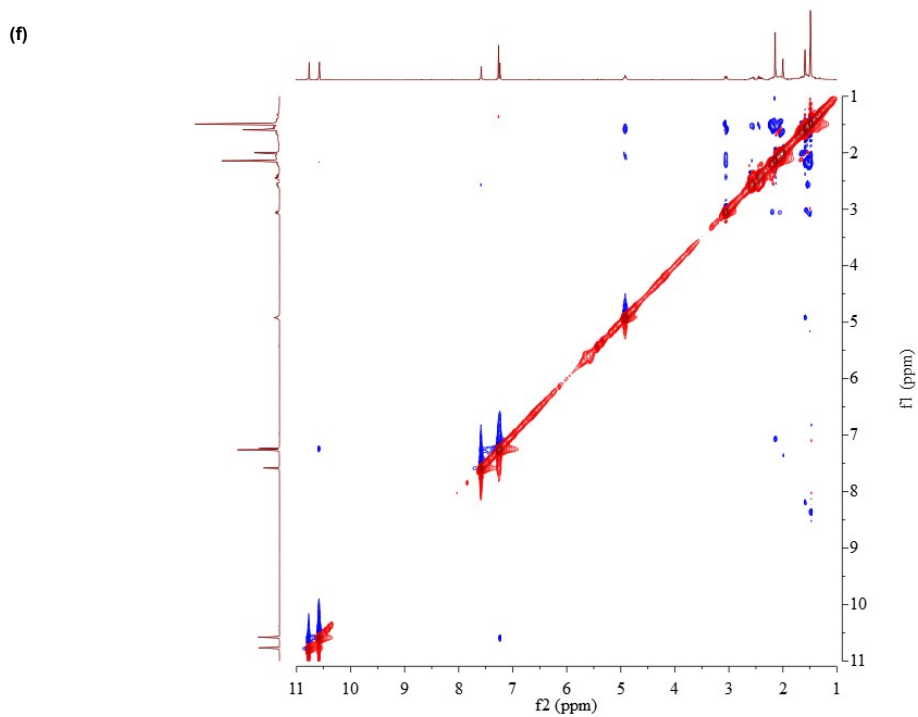

**Fig. S13** NMR spectra of **8**

(a)  $^1\text{H}$  NMR spectrum in  $\text{CDCl}_3$  at 400 MHz; (b)  $^{13}\text{C}$  NMR spectrum in  $\text{CDCl}_3$  at 100 MHz; (c)  $^1\text{H}$ - $^1\text{H}$  COSY spectrum in  $\text{CDCl}_3$  at 400 MHz; (d) HSQC spectrum in  $\text{CDCl}_3$  at 400 MHz; (e) HMBC spectrum in  $\text{CDCl}_3$  at 400 MHz; (f) ROESY spectrum in  $\text{CDCl}_3$  at 400 MHz.

## Supplementary References

- [1] Y. Matsuda, T. Wakimoto, T. Mori, T. Awakawa, I. Abe, *J Am Chem Soc* **2014**, *136*, 15326-15336.
- [2] Y. M. Zheng, F. L. Lin, H. Gao, G. Zou, J. W. Zhang, G. Q. Wang, G. D. Chen, Z. H. Zhou, X. S. Yao, D. Hu, *Sci Rep* **2017**, *7*, 9250.
